# Supplementary material for: Extractable Organofluorine Analysis in Pooled Human Serum and Placental Tissue Samples from an Austrian Subpopulation—A Mass Balance Analysis Approach
Source: PubMed Central journal article supplement (PMC8277134; doi:10.1021/acs.est.1c00883), 2021-06-16
Supplement: es1c00883_si_001.pdf [file es1c00883_si_001.pdf]

1 **Supplementary information (SI)**

2

3 **Extractable organofluorine analysis in pooled human serum and**  
4 **placental tissue from an Austrian sub-population – a mass balance**  
5 **analysis approach**

6

7 Andreas-Marius Kaiser<sup>1,2\*</sup>, Martin Forsthuber<sup>2,3</sup>, Rudolf Aro<sup>4</sup>, Anna Kärrman<sup>4</sup>, Claudia  
8 Gundacker<sup>2</sup>, Harald Zeisler<sup>5</sup>, Philipp Foessleitner<sup>6</sup>, Hans Salzer<sup>7</sup>, Christina  
9 Hartmann<sup>1</sup>, Maria Uhl<sup>1</sup>, and Leo W.Y. Yeung<sup>4\*\*</sup>

10

11

12 **Affiliations**

13 <sup>1</sup>Environment Agency Austria, Spittelauer Lände 5, A-1090 Vienna, Austria

14 <sup>2</sup>Institute of Medical Genetics, Center for Pathobiochemistry and Genetics, Medical University of  
15 Vienna, A-1090 Vienna, Austria

16 <sup>3</sup>Department of Environmental Health, Center for Public Health, Medical University of Vienna, A-1090  
17 Vienna, Austria

18 <sup>4</sup>Man-Technology-Environment Research Centre (MTM), Örebro University, Örebro, 701 82, Sweden

19 <sup>5</sup>Department of Obstetrics and Gynecology, Medical University Vienna, A-1090 Vienna, Austria

20 <sup>6</sup>Department of Gynecology and Obstetrics, University Hospital St. Poelten, A-3100 St. Poelten,  
21 Austria

22 <sup>7</sup>Clinic for Pediatrics and Adolescent Medicine, University Hospital Tulln, A-3430 Tulln, Austria

23

24

25 **Corresponding authors**

26 \*Andreas-Marius Kaiser, e-mail: [Andreas.Kaiser@umweltbundesamt.at](mailto:Andreas.Kaiser@umweltbundesamt.at)

27 \*\*Leo W.Y. Yeung, e-mail: [Leo.Yeung@oru.se](mailto:Leo.Yeung@oru.se)

## Table of Content

|      |                                                                                                       |
|------|-------------------------------------------------------------------------------------------------------|
| P.3  | PFAS concentrations in pooled samples                                                                 |
| P.6  | Figure S1: Heatmap representing Spearman correlations [...]                                           |
| P.7  | Limits of detection (LOD) and limits of quantification (LOQ)                                          |
| P.7  | Table S1: For the serum pool samples the limits of detection (LOD) [...]                              |
| P.9  | Table S2: For the placental tissue pool samples the limits of detection (LOD) [...]                   |
| P.12 | Concentrations of the individual serum and placental tissue pool samples                              |
| P.12 | Table S3: PFAS concentrations of the single maternal serum pool samples matS-A to matS-E              |
| P.14 | Table S4: PFAS concentrations of the single maternal serum pool samples matS-F to matS-J              |
| P.16 | Table S5: PFAS concentrations of the single maternal serum pool samples matS-K to matS-O              |
| P.18 | Table S6: PFAS concentrations of the single maternal serum pool samples matS-P to matS-U              |
| P.21 | Table S7: PFAS concentrations of the placental pool tissue samples plaT-A to plaT-E                   |
| P.23 | Table S8: PFAS concentrations of the placental pool tissue samples plaT-F to plaT-J                   |
| P.25 | Table S9: PFAS concentrations of the placental pool tissue samples plaT-K to plaT-M                   |
| P.27 | Table S10: PFAS concentrations of the cord serum pool samples cordS-B to cordS-H                      |
| P.30 | Table S11: PFAS concentrations of the cord serum pool samples cordS-K to cordS-U                      |
| P.32 | Table S12: Blanks (BW): for BW 1 and BW 2 3 mL Milli Q Water (MQ) [...]                               |
| P.34 | Table S13: Blanks (BW): for BW 6 and BW 7 3 mL Milli Q Water (MQ) [...]                               |
| P.36 | Table S14: Blanks (BW): for BW 11 and BW 12 3 mL Milli Q Water (MQ) [...]                             |
| P.38 | Table S15: Blanks (BW): for BW 1 and BW 3 3 mL Milli Q Water (MQ) [...]                               |
| P.41 | Extractable organofluorine (EOF) concentrations of the samples                                        |
| P.41 | Table S16: Identified EOF in ng F/mL in maternal serum (matS)                                         |
| P.42 | Table S17: Identified EOF in ng F/mL in placental tissue (plaT)                                       |
| P.42 | Table S18: Identified EOF in ng F/mL in cord serum (cordS)                                            |
| P.44 | Table S19: Detail information on the sample pooling                                                   |
| P.45 | Table S20: The comparison of EOF concentrations in ng F/mL of the present study with previous studies |
| P.46 | Correlation analyses and scatter plots                                                                |
| P.46 | Figure S2: Correlation between PFBA and EOF-CIC, [...]                                                |
| P.47 | Figure S3: Correlation between MeFOSAA and EOF-CIC, [...]                                             |
| P.48 | Figure S4: Correlation between 3:3 FTCA and EOF-CIC, [...]                                            |
| P.49 | Figure S5: Correlation between PFOS and EOF-CIC, [...]                                                |
| P.50 | Figure S6: Correlation between 6:2 FTSA and EOF-CIC, [...]                                            |
| P.51 | Figure S7: Correlation between PFECBS and EOF-CIC in matS                                             |
| P.52 | Abbreviations                                                                                         |
| P.56 | References                                                                                            |

## 32 **PFAS concentrations in pooled samples**

33 The average sum concentration (recovery corrected) of the 61 monitored PFAS  
34 ( $\sum_{61}\text{PFAS}$ ) in maternal serum (matS) was 4.8 ng/mL (ranging from 2.7 to 9.6 ng/mL;  
35  $p = 21$ ), 1.6 ng/g (0.73–3.2 ng/g;  $p = 13$ ) in placental tissue (plaT) and 2.0 ng/mL  
36 (0.35–3.3 ng/mL;  $p = 11$ ) in cord serum (cordS).

37

38 Of the 61 PFAS included in this study, 21 were detected at least once in maternal  
39 serum samples. The PFCAs were the dominant class – making up 46.8% of the  
40  $\sum_{61}\text{PFAS}$ . The PFCAs with the highest concentrations were PFOA (1.5 ng/mL  
41 ( $\pm 0.89$ )), perfluorononanoic acid (PFNA, 0.38 ng/mL ( $\pm 0.20$ )) and perfluorodecanoic  
42 acid (PFDA, 0.21 ng/mL ( $\pm 0.13$ )). These compounds were found in 100% of the  
43 maternal serum samples. Perfluorohexanoic acid (PFHxA, 0.012 ng/mL ( $\pm 0.0081$ ))  
44 and perfluoroheptanoic acid (PFHpA, 0.027 ng/mL ( $\pm 0.023$ )) were found in 66.7%  
45 and 90.5% of the maternal serum samples. The PFSA were the second largest class  
46 of PFAS (43.2%) – driven by linear PFOS (1.6 ng/mL ( $\pm 1.0$ )), branched PFOS  
47 (0.43 ng/mL ( $\pm 0.22$ )), perfluorohexane sulfonate (PFHxS, 0.46 ng/mL ( $\pm 0.15$ )) and  
48 perfluoroheptane sulfonate (PFHpS, 0.053 ng/mL ( $\pm 0.030$ )). These compounds were  
49 found in all of the maternal serum samples. Perfluorobutane sulfonate (PFBS, 0.010  
50 ng/mL ( $\pm 0.0056$ )) and perfluoropentane sulfonate (PFPeS, 0.0093 ng/mL ( $\pm 0.0077$ ))  
51 were found in 90.5% and 81.0% of the maternal serum samples. PFAA precursors  
52 together accounted for 10.0% of the  $\sum_{61}\text{PFAS}$ . N-methylperfluoro-n-octane  
53 sulfonamido acetic acid (MeFOSAA) and N-ethyl-perfluoro-n-octane sulfonamido  
54 acetic acid (EtFOSAA) were detected at trace levels (below 0.19 ng/mL) in 47.6%  
55 and 9.5% of samples. Of the other PFAS, perfluoro-4-ethylcyclohexane sulfonate  
56 (PFECHS) and ADONA were detected in 81.0% and 57.1% of samples respectively,  
57 with an average concentration of 0.038 ng/mL ( $\pm 0.0021$ ) and 0.022 ng/mL ( $\pm 0.020$ ).

58 In the placental tissue samples 23 different PFAS were detected at least once. The  
59 PFCAs were the dominant class in the placental tissue as well – making up 49.4% of  
60 the  $\sum_{61}$ PFAS. The PFCAs with the highest concentrations were PFOA (0.44 ng/mL  
61 ( $\pm 0.31$ )), PFNA (0.13 ng/mL ( $\pm 0.067$ )) and PFDA (0.068 ng/mL ( $\pm 0.032$ )). These  
62 compounds were found in all of the placental tissue samples. Perfluorobutanoic acid  
63 (PFBA, 0.025 ng/mL ( $\pm 0.018$ )) and PFHpA (0.011 ng/mL ( $\pm 0.0064$ )) were found in  
64 53.8% and 76.9% of the maternal serum samples. Long-chain PFCAs with carbon  
65 chains ranging from C11 to C14 were found in 100% of the samples except for  
66 perfluorotridecanoic acid (PFTrDA) which was detected in 92.3% of the placental  
67 tissue samples (perfluoroundecanoic acid (PFUnDA): 0.051 ng/mL ( $\pm 0.030$ ),  
68 perfluorododecanoic acid (PFDoDA): 0.024 ng/mL ( $\pm 0.018$ ), PFTrDA: 0.022 ng/mL  
69 ( $\pm 0.017$ ), perfluorotetradecanoic acid (PFTeDA): 0.039 ng/mL ( $\pm 0.029$ )). The PFASs  
70 were the second largest class of PFAS – linear PFOS (0.53 ng/mL ( $\pm 0.26$ )),  
71 branched PFOS (0.094 ng/mL ( $\pm 0.031$ )), PFHxS (0.11 ng/mL ( $\pm 0.045$ )), PFHpS  
72 (0.014 ng/mL ( $\pm 0.0067$ )), perfluorodecanoic sulfonate (PFDS, 0.0043 ng/mL  
73 ( $\pm 0.012$ )) and perfluorododecanoic sulfonate (PFDoDS, 0.00060 ng/mL ( $\pm 0.00020$ )).  
74 PFHxS, PFHpS, linear PFOS and branched PFOS were found in 100% and PFDS  
75 and PFDoDS in 7.7% of the placental tissue samples. PFAA precursors together  
76 accounted for 10.1% of the  $\sum_{61}$ PFAS. MeFOSAA and EtFOSAA were detected at  
77 trace levels (below 0.012 ng/mL) in 100% and 69.2% of samples. The two  
78 polyfluoroalkyl phosphoric acid diesters (diPAP), 6:2 diPAP and 8:2 diPAP, were  
79 detected at trace levels (below 0.040 ng/mL) in 15.4% and 7.7% of samples,  
80 respectively.

81

82 Of the 61 compounds monitored, 18 were found in the cord serum samples. The  
83 PFCAs were the dominant class in the cord serum samples as well – making up

84 56.4% of the  $\sum_{61}$ PFAS. The PFCAs with the highest concentrations were PFOA  
85 (0.85 ng/mL ( $\pm 0.37$ )), PFNA (0.15 ng/mL ( $\pm 0.072$ )) and PFDA (0.050 ng/mL  
86 ( $\pm 0.023$ )). These compounds were found in 100% of the cord serum samples except  
87 for PFDA which was found in 90.9% of the samples. PFHxA (0.019 ng/mL ( $\pm 0.0083$ ))  
88 and PFHpA (0.032 ng/mL ( $\pm 0.022$ )) were found in 18.2% and 90.9% of the cord  
89 serum samples, respectively. The longer chain compounds, PFUnDA (0.034 ng/mL  
90 ( $\pm 0.017$ )) and PFDoDA (0.010 ng/mL ( $\pm 0.0060$ )) were found in 100% and 54.5% of  
91 the cord serum samples. The PFSAAs were the second largest class of PFAS in the  
92 cord serum as well 33.3% – driven by linear PFOS (0.38 ng/mL ( $\pm 0.20$ )), branched  
93 PFOS (0.18 ng/mL ( $\pm 0.082$ )), PFHxS (0.22 ng/mL ( $\pm 0.081$ )) and PFHpS  
94 (0.018 ng/mL ( $\pm 0.010$ )). Linear and branched PFOS as well as PFHxS were found in  
95 100% and PFHpS in 90.9% of the cord serum samples. PFBS (0.0065 ng/mL  
96 ( $\pm 0.0035$ )) and PFPeS (0.0046 ng/mL ( $\pm 0.0026$ )) were found both in 81.8% of cord  
97 serum samples. PFAA precursors together accounted for 10.4% of the  $\sum_{61}$ PFAS.  
98 MeFOSAA and EtFOSAA were detected at trace levels (below 0.17 ng/mL) in 45.5%  
99 and 18.2% of samples. Of the other PFAS, PFECBS and ADONA were detected in  
100 90.9% and 72.7% of samples respectively, with an average concentration of  
101 0.0027 ng/mL ( $\pm 0.0019$ ) and 0.015 ng/mL ( $\pm 0.010$ ), respectively. The limits of  
102 detection (LOD) and limits of quantification (LOQ) for the individual sample volumes  
103 are provided in Table S1 and Table S2. Table S3 to Table S11 provide individual PFAS  
104 concentrations for all sample pools, and Table S12 to Table S15 provide the  
105 individual PFAS concentrations for all blanks.

106

107 Figure S1 shows the Spearman correlations for the pooled maternal serum and their  
108 related pooled cord serum samples (compounds at least detected in 4 related  
109 samples, except for EtFOSAA which was detected only in two related samples above

110 the LOD). Statistically significant positive correlations were observed for 9 PFAS,  
 111 which include perfluoroheptanoic acid (PFHpA), perfluorononanoic acid (PFNA),  
 112 perfluorodecanoic acid (PFDA), perfluorohexanoic sulfonate (PFHxS), L-PFOS, 7:3  
 113 FTCA, ADONA, MeFOSAA and EtFOSAA. No statistically significant differences  
 114 were found in cord serum between males and females for any of the detected PFAS  
 115 except for perfluoroheptanoic sulfonate (PFHpS;  $p < 0.02$ ).

116

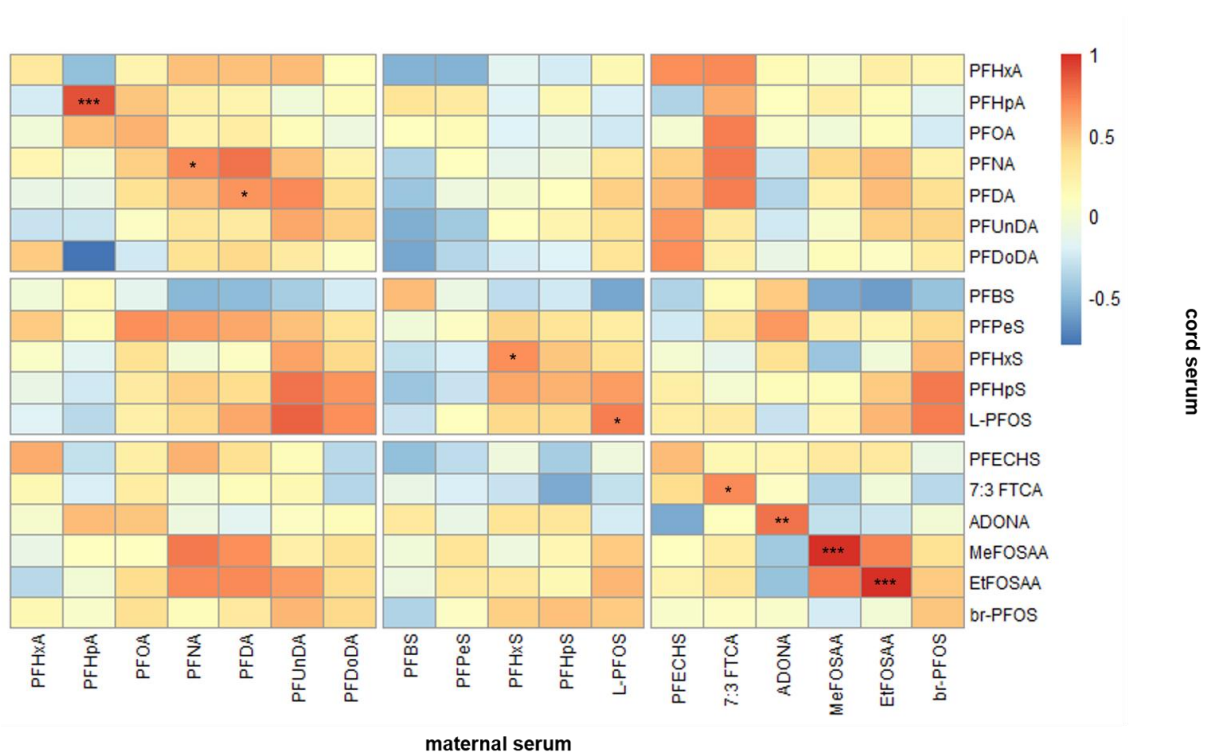

117

118 Figure S1: Heatmap representing Spearman correlations between the pooled maternal serum ( $p = 10$ )  
 119 and their related pooled cord serum ( $p = 10$ ), correlations that were statistically significant are marked  
 120 additionally with stars (\*  $< 0.05$ ; \*\*  $< 0.01$ ; and \*\*\*  $< 0.001$ ).

121

122

123 **Limits of detection (LOD) and limits of quantification (LOQ)**

124

125 Table S1: For the serum pool samples the limits of detection (LOD) and the limits of quantification

126 (LOQ) were calculated respecting their specific sample volumes and recoveries by the applied SPE-

127 WAX method.

| Lowest and highest LOD and lowest and highest LOQ for serum samples in pg/mL |            |            |             |             |
|------------------------------------------------------------------------------|------------|------------|-------------|-------------|
| Compound                                                                     | Lowest LOD | Lowest LOQ | Highest LOD | Highest LOQ |
| PFBA                                                                         | 4.0        | 8.0        | 70          | 140         |
| PFPeA                                                                        | 2.2        | 4.4        | 30          | 60          |
| PFHxA                                                                        | 2.0        | 4.0        | 40          | 80          |
| PFHpA                                                                        | 3.5        | 7.0        | 65          | 130         |
| PFOA                                                                         | 2.5        | 5.0        | 45          | 90          |
| PFNA                                                                         | 0.70       | 1.4        | 15          | 30          |
| PFDA                                                                         | 6.0        | 12         | 100         | 200         |
| PFUnDA                                                                       | 0.70       | 1.4        | 13          | 26          |
| PFDoDA                                                                       | 2.0        | 4.0        | 35          | 70          |
| PFTTrDA                                                                      | 1.5        | 3.0        | 20          | 40          |
| PFTDA                                                                        | 4.0        | 8.0        | 70          | 140         |
| PFHxDA                                                                       | 65         | 130        | 950         | 1900        |
| PFOcDA                                                                       | 48138      | 96277      | 924256      | 1848000     |
| PFBS                                                                         | 0.30       | 0.60       | 5.0         | 10          |
| PFPeS                                                                        | 0.30       | 0.60       | 5.0         | 10          |
| PFHxS                                                                        | 2.5        | 5.0        | 40          | 80          |
| PFHpS                                                                        | 0.30       | 0.60       | 5.0         | 10.0        |
| L-PFOS                                                                       | 3.0        | 6.0        | 50          | 100         |
| PFNS                                                                         | 0.50       | 1.0        | 8.0         | 16          |
| PFDS                                                                         | 0.35       | 0.70       | 5.5         | 11          |
| PFDoDS                                                                       | 7.0        | 14         | 100         | 200         |
| PFECHS                                                                       | 0.25       | 0.50       | 4.5         | 9.0         |
| FBSA                                                                         | 1.0        | 2.0        | 20          | 40          |
| MeFBSA                                                                       | 8.0        | 16         | 120         | 240         |

|                |        |        |         |         |
|----------------|--------|--------|---------|---------|
| FHxSA          | 0.70   | 1.4    | 11      | 22      |
| MeFHxSA        | 2.0    | 4.0    | 35      | 70      |
| FOSA           | 0.30   | 0.60   | 5.0     | 10      |
| MeFOSA         | 12.5   | 25     | 250     | 500     |
| EtFOSA         | 16     | 32     | 300     | 600     |
| MeFOSE         | 15     | 30     | 280     | 560     |
| EtFOSE         | 17     | 34     | 325     | 650     |
| 3:3 FTCA       | 1.6    | 3.2    | 22      | 44      |
| 5:3 FTCA       | 0.70   | 1.4    | 10      | 20      |
| 7:3 FTCA       | 0.85   | 1.7    | 12      | 24      |
| 6:2 FTUCA      | 0.80   | 1.6    | 12      | 24      |
| 8:2 FTUCA      | 0.40   | 0.80   | 6.5     | 13      |
| 10:2 FTUCA     | 0.50   | 1.0    | 8.5     | 17      |
| 4:2 FTSA       | 0.20   | 0.40   | 3.75    | 7.5     |
| 6:2 FTSA       | 0.60   | 1.2    | 7.5     | 15      |
| 8:2 FTSA       | 0.18   | 0.36   | 3.2     | 6.4     |
| 10:2 FTSA      | 5.0    | 10     | 100     | 200     |
| PFHxPA         | 0.75   | 1.5    | 15      | 30      |
| PFOPA          | 4800   | 9600   | 92000   | 184000  |
| PFDPA          | 25     | 50     | 340     | 680     |
| 6:6 PFPiA      | 2.4    | 4.8    | 38      | 76      |
| 6:8 PFPiA      | 900    | 1800   | 12500   | 25000   |
| 8:8 PFPiA      | 130000 | 260000 | 2485000 | 4970000 |
| 8:2 CI-PFESA   | 0.40   | 0.80   | 6.0     | 12      |
| 6:2 CI-PFESA   | 0.25   | 0.50   | 3.75    | 7.5     |
| ADONA          | 0.625  | 1.25   | 10      | 20      |
| HFPO-DA (GenX) | 7.5    | 15     | 100     | 200     |
| MeFOSAA        | 1.25   | 2.5    | 25      | 50      |
| EtFOSAA        | 5.0    | 10     | 42      | 84      |
| diSAmpPAP      | 5900   | 11800  | 47000   | 94000   |
| 6:2 monoPAP    | 43500  | 87000  | 347000  | 694000  |
| 8:2 monoPAP    | 11000  | 22000  | 87500   | 175000  |



|                      |       |       |        |        |
|----------------------|-------|-------|--------|--------|
| 10:2 monoPAP         | 14    | 28    | 100    | 200    |
| 6:2 diPAP            | 28    | 56    | 225    | 450    |
| 8:2 diPAP            | 480   | 960   | 3900   | 7800   |
| 6:2/8:2 diPAP        | 550   | 1100  | 4250   | 8500   |
| 10:2 diPAP           | 22000 | 44000 | 174000 | 348000 |
| PFOS-branch $\Sigma$ |       |       |        |        |

128

129

130 Table S2: For the placental tissue pool samples the limits of detection (LOD) and the limits of  
131 quantification (LOQ) were calculated respecting their specific sample masses and recoveries - "n.a."  
132 means not available, since no peak was observed caused by a shift of the chromatogram.

| Lowest and highest LOD and lowest and highest LOQ for placental tissue in pg/g |            |            |             |             |
|--------------------------------------------------------------------------------|------------|------------|-------------|-------------|
| Compound                                                                       | Lowest LOD | Lowest LOQ | Highest LOD | Highest LOQ |
| PFBA                                                                           | 0.55       | 1.1        | 2.2         | 4.4         |
| PFPeA                                                                          | 0.35       | 0.70       | 1.4         | 2.8         |
| PFHxA                                                                          | 0.40       | 0.80       | 1.5         | 3.0         |
| PFHpA                                                                          | 0.85       | 1.7        | 3.5         | 7.0         |
| PFOA                                                                           | 0.70       | 1.4        | 3.0         | 6.0         |
| PFNA                                                                           | 0.25       | 0.50       | 1.0         | 2.0         |
| PFDA                                                                           | 1.8        | 3.6        | 7.0         | 14          |
| PFUnDA                                                                         | 0.45       | 0.90       | 1.8         | 3.6         |
| PFDoDA                                                                         | 0.40       | 0.80       | 1.5         | 3.0         |
| PFTTrDA                                                                        | 0.10       | 0.20       | 0.40        | 0.80        |
| PFTDA                                                                          | 0.10       | 0.20       | 0.40        | 0.80        |
| PFHxDA                                                                         | 1.4        | 2.8        | 5.5         | 11          |
| PFOcDA                                                                         | 130        | 260        | 500         | 1000        |
| PFBS                                                                           | 0.050      | 0.10       | 0.20        | 0.40        |
| PFPeS                                                                          | 0.070      | 0.14       | 0.26        | 0.52        |
| PFHxS                                                                          | 0.60       | 1.2        | 2.5         | 5.0         |
| PFHpS                                                                          | 0.065      | 0.13       | 0.25        | 0.50        |
| L-PFOS                                                                         | 0.50       | 1.0        | 2.0         | 4.0         |
| PFNS                                                                           | n.a.       | n.a.       | n.a.        | n.a.        |

|                     |       |       |       |       |
|---------------------|-------|-------|-------|-------|
| PFDS                | 0.050 | 0.10  | 0.20  | 0.40  |
| PFD <sub>o</sub> DS | 0.20  | 0.40  | 0.85  | 1.7   |
| PFECHS              | n.a.  | n.a.  | n.a.  | n.a.  |
| FBSA                | 0.20  | 0.40  | 0.80  | 1.6   |
| MeFBSA              | 0.80  | 1.6   | 3.5   | 7.0   |
| FHxSA               | 0.20  | 0.40  | 0.70  | 1.4   |
| MeFHxSA             | 0.70  | 1.4   | 2.8   | 5.6   |
| FOSA                | 0.20  | 0.40  | 0.70  | 1.4   |
| MeFOSA              | 10    | 20    | 38    | 76    |
| EtFOSA              | 45    | 90    | 180   | 360   |
| MeFOSE              | 3900  | 7800  | 15500 | 31000 |
| EtFOSE              | n.a.  | n.a.  | n.a.  | n.a.  |
| 3:3 FTCA            | 0.20  | 0.40  | 0.85  | 1.7   |
| 5:3 FTCA            | 0.075 | 0.15  | 0.30  | 0.60  |
| 7:3 FTCA            | 0.22  | 0.44  | 0.95  | 1.9   |
| 6:2 FTUCA           | 0.15  | 0.30  | 0.60  | 1.2   |
| 8:2 FTUCA           | 0.20  | 0.40  | 0.75  | 1.5   |
| 10:2 FTUCA          | 0.375 | 0.75  | 1.5   | 3.0   |
| 4:2 FTSA            | 0.030 | 0.060 | 0.12  | 0.24  |
| 6:2 FTSA            | 0.070 | 0.14  | 0.275 | 0.55  |
| 8:2 FTSA            | 0.034 | 0.068 | 0.14  | 0.28  |
| 10:2 FTSA           | n.a.  | n.a.  | n.a.  | n.a.  |
| PFHxPA              | 0.32  | 0.64  | 1.25  | 2.5   |
| PFOPA               | 15    | 30    | 60    | 120   |
| PFDPA               | 30    | 60    | 120   | 240   |
| 6:6 PFPiA           | 6.0   | 1.2   | 2.5   | 5.0   |
| 6:8 PFPiA           | 100   | 200   | 430   | 860   |
| 8:8 PFPiA           | 300   | 600   | 1150  | 2300  |
| 8:2 Cl-PFESA        | 0.050 | 0.10  | 0.20  | 0.40  |
| 6:2 Cl-PFESA        | n.a.  | n.a.  | n.a.  | n.a.  |
| ADONA               | 0.18  | 0.36  | 0.85  | 1.7   |
| HFPO-DA (GenX)      | 90    | 180   | 350   | 700   |

|                      |      |       |       |       |
|----------------------|------|-------|-------|-------|
| MeFOSAA              | 0.30 | 0.60  | 1.0   | 2.0   |
| EtFOSAA              | 1.2  | 2.4   | 5.0   | 10    |
| diSAmPAP             | 2.0  | 4.0   | 8.25  | 16.5  |
| 6:2 monoPAP          | 7000 | 14000 | 28000 | 56000 |
| 8:2 monoPAP          | 1750 | 3500  | 7000  | 14000 |
| 10:2 monoPAP         | 1900 | 3800  | 7600  | 15200 |
| 6:2 diPAP            | 2.5  | 5.0   | 10    | 20    |
| 8:2 diPAP            | 0.75 | 1.5   | 3.0   | 6.0   |
| 6:2/8:2 diPAP        | 3.75 | 7.5   | 14    | 28    |
| 10:2 diPAP           | 250  | 500   | 1000  | 2000  |
| PFOS-branch $\Sigma$ |      |       |       |       |

133

134

135

136 **Concentrations of the individual serum and placental tissue pool samples**

137

138 Table S3: PFAS concentrations of the single maternal serum pool samples matS-A to matS-E in  
 139 ng/mL (not concentrated value, so the concentrations represents the mean of each single sample in  
 140 the respective pool) – the number in the “( )” represents the number of samples which were pooled  
 141 together

| Summary of the concentrations [ng/mL] of pooled maternal serum from A-E |            |            |            |            |            |
|-------------------------------------------------------------------------|------------|------------|------------|------------|------------|
| Compound                                                                | matS-A (3) | matS-B (2) | matS-C (3) | matS-D (3) | matS-E (1) |
| PFBA                                                                    | <LOD       | <LOD       | <LOD       | <LOD       | <LOD       |
| PFPeA                                                                   | <LOD       | <LOD       | <LOD       | <LOD       | <LOD       |
| PFHxA                                                                   | 0.011      | <LOQ       | 0.015      | 0.012      | <LOQ       |
| PFHpA                                                                   | 0.017      | 0.042      | 0.020      | 0.028      | <LOD       |
| PFOA                                                                    | 1.56       | 1.82       | 1.43       | 1.35       | 0.97       |
| PFNA                                                                    | 0.98       | 0.23       | 0.34       | 0.36       | 0.56       |
| PFDA                                                                    | 0.29       | 0.13       | 0.19       | 0.18       | 0.67       |
| PFUnDA                                                                  | 0.19       | 0.060      | 0.063      | 0.045      | 0.38       |
| PFDoDA                                                                  | 0.013      | <LOD       | 0.011      | 0.0092     | 0.092      |
| PFTrDA                                                                  | n.a.       | n.a.       | n.a.       | n.a.       | n.a.       |
| PFTDA                                                                   | n.a.       | n.a.       | n.a.       | n.a.       | n.a.       |
| PFHxDA                                                                  | n.a.       | n.a.       | n.a.       | n.a.       | n.a.       |
| PFOcDA                                                                  | n.a.       | n.a.       | n.a.       | n.a.       | n.a.       |
| PFBS                                                                    | 0.0073     | 0.014      | 0.010      | 0.0029     | <LOD       |
| PFPeS                                                                   | 0.0087     | 0.016      | 0.018      | 0.0054     | <LOD       |
| PFHxS                                                                   | 0.44       | 0.45       | 0.58       | 0.27       | 0.48       |
| PFHpS                                                                   | 0.037      | 0.038      | 0.054      | 0.044      | 0.10       |
| L-PFOS                                                                  | 0.77       | 0.93       | 1.49       | 1.07       | 4.63       |
| PFNS                                                                    | <LOD       | <LOD       | <LOD       | <LOD       | <LOD       |
| PFDS                                                                    | <LOD       | <LOD       | <LOD       | <LOD       | <LOD       |
| PFDoDS                                                                  | n.a.       | n.a.       | n.a.       | n.a.       | n.a.       |
| PFECHS                                                                  | <LOD       | 0.0032     | 0.0024     | 0.0035     | <LOD       |
| FBSA                                                                    | <LOD       | <LOD       | <LOD       | <LOD       | <LOD       |
| MeFBSA                                                                  | n.a.       | n.a.       | n.a.       | n.a.       | n.a.       |

|                |        |        |       |        |        |
|----------------|--------|--------|-------|--------|--------|
| FHxSA          | <LOD   | <LOD   | <LOD  | <LOD   | <LOD   |
| MeFHxSA        | <LOD   | <LOD   | <LOD  | <LOD   | <LOD   |
| FOSA           | <LOD   | <LOD   | <LOD  | <LOD   | <LOD   |
| MeFOSA         | <LOD   | <LOD   | <LOD  | <LOD   | <LOD   |
| EtFOSA         | <LOD   | <LOD   | <LOD  | <LOD   | <LOD   |
| MeFOSE         | <LOD   | <LOD   | <LOD  | <LOD   | <LOD   |
| EtFOSE         | <LOD   | <LOD   | <LOD  | <LOD   | <LOD   |
| 3:3 FTCA       | <LOD   | <LOD   | <LOD  | <LOD   | <LOD   |
| 5:3 FTCA       | <LOD   | <LOD   | <LOD  | <LOD   | <LOD   |
| 7:3 FTCA       | 0.016  | 0.012  | <LOD  | 0.0068 | <LOD   |
| 6:2 FTUCA      | <LOD   | <LOD   | <LOD  | <LOD   | <LOD   |
| 8:2 FTUCA      | <LOD   | <LOD   | <LOD  | <LOD   | <LOD   |
| 10:2 FTUCA     | <LOD   | <LOD   | <LOD  | <LOD   | <LOD   |
| 4:2 FTSA       | <LOD   | <LOD   | <LOD  | <LOD   | <LOD   |
| 6:2 FTSA       | n.a.   | n.a.   | n.a.  | n.a.   | n.a.   |
| 8:2 FTSA       | <LOD   | <LOD   | <LOD  | <LOD   | <LOD   |
| 10:2 FTS       | <LOD   | <LOD   | <LOD  | <LOD   | <LOD   |
| PFHxPA         | <LOD   | <LOD   | <LOD  | <LOD   | <LOD   |
| PFOPA          | n.a.   | n.a.   | n.a.  | n.a.   | n.a.   |
| PFDPA          | n.a.   | n.a.   | n.a.  | n.a.   | n.a.   |
| 6:6 PFPiA      | <LOD   | <LOD   | <LOD  | <LOD   | <LOD   |
| 6:8 PFPiA      | n.a.   | n.a.   | n.a.  | n.a.   | n.a.   |
| 8:8 PFPiA      | n.a.   | n.a.   | n.a.  | n.a.   | n.a.   |
| 8:2 CI-PFESA   | <LOD   | <LOD   | <LOD  | <LOD   | <LOD   |
| 6:2 CI-PFESA   | <LOD   | <LOD   | <LOD  | <LOD   | <LOD   |
| ADONA          | <LOD   | 0.0056 | 0.024 | <LOD   | 0.0736 |
| HFPO-DA (GenX) | n.a.   | n.a.   | n.a.  | n.a.   | n.a.   |
| MeFOSAA        | 0.0058 | <LOD   | <LOQ  | 0.012  | <LOD   |
| EtFOSAA        | <LOD   | <LOD   | <LOD  | <LOD   | <LOD   |
| diSAmPAP       | n.a.   | n.a.   | n.a.  | n.a.   | n.a.   |
| 6:2 monoPAP    | n.a.   | n.a.   | n.a.  | n.a.   | n.a.   |
| 8:2 monoPAP    | n.a.   | n.a.   | n.a.  | n.a.   | n.a.   |

|                      |      |      |      |      |      |
|----------------------|------|------|------|------|------|
| 10:2 monoPAP         | <LOD | <LOD | <LOD | <LOD | <LOD |
| 6:2 diPAP            | <LOD | <LOD | <LOD | <LOD | <LOD |
| 8:2 diPAP            | n.a. | n.a. | n.a. | n.a. | n.a. |
| 6:2/8:2 diPAP        | n.a. | n.a. | n.a. | n.a. | n.a. |
| 10:2 diPAP           | n.a. | n.a. | n.a. | n.a. | n.a. |
| PFOS-branch $\Sigma$ | 0.28 | 0.30 | 0.50 | 0.36 | 0.50 |

142

143 Table S4: PFAS concentrations of the single maternal serum pool samples matS-F to matS-J in ng/mL

144 (not concentrated value, so the concentrations represents the mean of each single sample in the

145 respective pool) – the number in the “( )” represents the number of samples which were pooled

146 together

| Summary of the concentrations [ng/mL] of pooled maternal serum from F-M |            |            |            |            |            |
|-------------------------------------------------------------------------|------------|------------|------------|------------|------------|
| Compound                                                                | matS-F (4) | matS-G (2) | matS-H (3) | matS-I (1) | matS-J (2) |
| PFBA                                                                    | <LOD       | <LOD       | <LOD       | <LOD       | <LOD       |
| PFPeA                                                                   | <LOD       | <LOD       | <LOD       | <LOD       | <LOD       |
| PFHxA                                                                   | 0.011      | 0.025      | <LOQ       | <LOD       | 0.016      |
| PFHpA                                                                   | 0.012      | <LOQ       | <LOQ       | <LOD       | 0.056      |
| PFOA                                                                    | 0.78       | 0.52       | 1.41       | 3.62       | 4.17       |
| PFNA                                                                    | 0.21       | 0.15       | 0.50       | 0.64       | 0.51       |
| PFDA                                                                    | 0.12       | 0.048      | 0.30       | 0.23       | 0.34       |
| PFUnDA                                                                  | 0.043      | 0.010      | 0.080      | 0.033      | 0.14       |
| PFDoDA                                                                  | 0.0071     | 0.0040     | 0.011      | <LOD       | 0.042      |
| PFTTrDA                                                                 | n.a.       | n.a.       | n.a.       | n.a.       | n.a.       |
| PFTDA                                                                   | n.a.       | n.a.       | n.a.       | n.a.       | n.a.       |
| PFHxDA                                                                  | n.a.       | n.a.       | n.a.       | n.a.       | n.a.       |
| PFOcDA                                                                  | n.a.       | n.a.       | n.a.       | n.a.       | n.a.       |
| PFBS                                                                    | 0.0063     | 0.011      | 0.0073     | 0.010      | 0.022      |
| PFPeS                                                                   | 0.0040     | 0.011      | 0.0038     | <LOD       | 0.0051     |
| PFHxS                                                                   | 0.25       | 0.72       | 0.39       | 0.59       | 0.74       |
| PFHpS                                                                   | 0.034      | 0.068      | 0.033      | 0.075      | 0.061      |
| L-PFOS                                                                  | 0.91       | 1.27       | 1.45       | 1.05       | 2.72       |
| PFNS                                                                    | <LOD       | <LOD       | <LOD       | <LOD       | <LOD       |

|                     |        |        |       |      |        |
|---------------------|--------|--------|-------|------|--------|
| PFDS                | <LOD   | <LOD   | <LOD  | <LOD | <LOD   |
| PFD <sub>o</sub> DS | n.a.   | n.a.   | n.a.  | n.a. | n.a.   |
| PFECHS              | 0.0023 | n.n.   | 0.011 | n.n. | 0.0055 |
| FBSA                | <LOD   | <LOD   | <LOD  | <LOD | <LOD   |
| MeFBSA              | n.a.   | n.a.   | n.a.  | n.a. | n.a.   |
| FHxSA               | <LOD   | <LOD   | <LOD  | <LOD | <LOD   |
| MeFHxSA             | <LOD   | <LOD   | <LOD  | <LOD | <LOD   |
| FOSA                | <LOD   | <LOD   | <LOD  | <LOD | <LOD   |
| MeFOSA              | <LOD   | <LOD   | <LOD  | <LOD | <LOD   |
| EtFOSA              | <LOD   | <LOD   | <LOD  | <LOD | <LOD   |
| MeFOSE              | <LOD   | <LOD   | <LOD  | <LOD | <LOD   |
| EtFOSE              | <LOD   | <LOD   | <LOD  | <LOD | <LOD   |
| 3:3 FTCA            | <LOD   | <LOD   | <LOD  | <LOD | <LOD   |
| 5:3 FTCA            | <LOD   | <LOD   | <LOD  | <LOD | <LOD   |
| 7:3 FTCA            | 0.0040 | <LOD   | 0.013 | <LOD | <LOD   |
| 6:2 FTUCA           | <LOD   | <LOD   | <LOD  | <LOD | <LOD   |
| 8:2 FTUCA           | <LOD   | <LOD   | <LOD  | <LOD | <LOD   |
| 10:2 FTUCA          | <LOD   | <LOD   | <LOD  | <LOD | <LOD   |
| 4:2 FTSA            | <LOD   | <LOD   | <LOD  | <LOD | <LOD   |
| 6:2 FTSA            | n.a.   | n.a.   | n.a.  | n.a. | n.a.   |
| 8:2 FTSA            | <LOD   | <LOD   | <LOD  | <LOD | <LOD   |
| 10:2 FTSA           | <LOD   | <LOD   | <LOD  | <LOD | <LOD   |
| PFHxPA              | <LOD   | <LOD   | <LOD  | <LOD | <LOD   |
| PFOPA               | n.a.   | n.a.   | n.a.  | n.a. | n.a.   |
| PFDPA               | n.a.   | n.a.   | n.a.  | n.a. | n.a.   |
| 6:6 PFPiA           | <LOD   | <LOD   | <LOD  | <LOD | <LOD   |
| 6:8 PFPiA           | n.a.   | n.a.   | n.a.  | n.a. | n.a.   |
| 8:8 PFPiA           | n.a.   | n.a.   | n.a.  | n.a. | n.a.   |
| 8:2 CI-PFESA        | <LOD   | <LOD   | <LOD  | <LOD | <LOD   |
| 6:2 CI-PFESA        | <LOD   | <LOD   | <LOD  | <LOD | <LOD   |
| ADONA               | 0.0071 | 0.0060 | <LOD  | <LOD | <LOQ   |
| HFPO-DA (GenX)      | n.a.   | n.a.   | n.a.  | n.a. | n.a.   |

|                      |       |      |       |      |      |
|----------------------|-------|------|-------|------|------|
| MeFOSAA              | 0.028 | <LOD | 0.020 | <LOD | <LOD |
| EtFOSAA              | <LOD  | <LOD | <LOQ  | <LOD | <LOD |
| diSAmPAP             | n.a.  | n.a. | n.a.  | n.a. | n.a. |
| 6:2 monoPAP          | n.a.  | n.a. | n.a.  | n.a. | n.a. |
| 8:2 monoPAP          | n.a.  | n.a. | n.a.  | n.a. | n.a. |
| 10:2 monoPAP         | <LOD  | <LOD | <LOD  | <LOD | <LOD |
| 6:2 diPAP            | <LOD  | <LOD | <LOD  | <LOD | <LOD |
| 8:2 diPAP            | n.a.  | n.a. | n.a.  | n.a. | n.a. |
| 6:2/8:2 diPAP        | n.a.  | n.a. | n.a.  | n.a. | n.a. |
| 10:2 diPAP           | n.a.  | n.a. | n.a.  | n.a. | n.a. |
| PFOS-branch $\Sigma$ | 0.23  | 0.36 | 0.38  | 0.60 | 0.59 |

147

148

149 Table S5: PFAS concentrations of the single maternal serum pool samples matS-K to matS-O in  
150 ng/mL (not concentrated value, so the concentrations represents the mean of each single sample in  
151 the respective pool) – the number in the “( )” represents the number of samples which were pooled  
152 together

| Summary of the concentrations [ng/mL] of pooled maternal serum from K-O |            |            |            |            |            |
|-------------------------------------------------------------------------|------------|------------|------------|------------|------------|
| Compound                                                                | matS-K (3) | matS-L (3) | matS-M (2) | matS-N (3) | matS-O (2) |
| PFBA                                                                    | <LOD       | <LOD       | <LOD       | <LOD       | <LOD       |
| PFPeA                                                                   | <LOD       | <LOD       | <LOD       | <LOD       | <LOD       |
| PFHxA                                                                   | 0.012      | 0.0088     | <LOD       | <LOD       | <LOD       |
| PFHpA                                                                   | 0.021      | 0.026      | <LOQ       | 0.090      | 0.075      |
| PFOA                                                                    | 1.69       | 1.50       | 1.47       | 1.38       | 2.11       |
| PFNA                                                                    | 0.44       | 0.23       | 0.27       | 0.27       | 0.65       |
| PFDA                                                                    | 0.22       | 0.12       | 0.15       | 0.12       | 0.31       |
| PFUnDA                                                                  | 0.096      | 0.050      | 0.052      | 0.049      | 0.11       |
| PFDoDA                                                                  | 0.013      | <LOD       | <LOD       | 0.014      | 0.050      |
| PFTTrDA                                                                 | n.a.       | n.a.       | n.a.       | n.a.       | n.a.       |
| PFTDA                                                                   | n.a.       | n.a.       | n.a.       | n.a.       | n.a.       |
| PFHxDA                                                                  | n.a.       | n.a.       | n.a.       | n.a.       | n.a.       |



|            |        |        |        |        |        |
|------------|--------|--------|--------|--------|--------|
| PFOcDA     | n.a.   | n.a.   | n.a.   | n.a.   | n.a.   |
| PFBS       | <LOD   | 0.0078 | 0.0062 | 0.018  | 0.0096 |
| PFPeS      | <LOD   | <LOQ   | <LOD   | 0.010  | 0.032  |
| PFHxS      | 0.44   | 0.54   | 0.48   | 0.33   | 0.68   |
| PFHpS      | 0.046  | 0.038  | 0.032  | 0.058  | 0.16   |
| L-PFOS     | 1.38   | 0.86   | 1.51   | 1.02   | 3.97   |
| PFNS       | <LOD   | <LOD   | <LOD   | <LOD   | <LOD   |
| PFDS       | <LOD   | <LOD   | <LOD   | <LOD   | <LOD   |
| PFDoDS     | n.a.   | n.a.   | n.a.   | n.a.   | n.a.   |
| PFECHS     | 0.0051 | 0.0033 | <LOQ   | 0.0022 | 0.0033 |
| FBSA       | <LOD   | <LOD   | <LOD   | <LOD   | <LOD   |
| MeFBSA     | n.a.   | n.a.   | <LOD   | <LOD   | <LOD   |
| FHxSA      | <LOD   | <LOD   | <LOD   | <LOD   | <LOD   |
| MeFHxSA    | <LOD   | <LOD   | <LOD   | <LOD   | <LOD   |
| FOSA       | <LOD   | <LOD   | <LOD   | <LOD   | <LOD   |
| MeFOSA     | <LOD   | <LOD   | <LOD   | <LOD   | <LOD   |
| EtFOSA     | <LOD   | <LOD   | n.a.   | n.a.   | n.a.   |
| MeFOSE     | <LOD   | <LOD   | <LOD   | <LOD   | <LOD   |
| EtFOSE     | <LOD   | <LOD   | <LOD   | <LOD   | <LOD   |
| 3:3 FTCA   | <LOD   | <LOD   | <LOD   | <LOD   | <LOD   |
| 5:3 FTCA   | <LOD   | <LOD   | <LOD   | <LOD   | <LOD   |
| 7:3 FTCA   | 0.021  | <LOD   | 0.0086 | 0.010  | 0.0097 |
| 6:2 FTUCA  | <LOD   | <LOD   | <LOQ   | <LOD   | <LOD   |
| 8:2 FTUCA  | <LOD   | <LOD   | <LOD   | <LOD   | <LOD   |
| 10:2 FTUCA | <LOD   | <LOD   | <LOD   | <LOD   | <LOD   |
| 4:2 FTSA   | <LOD   | <LOD   | <LOD   | <LOD   | <LOD   |
| 6:2 FTSA   | n.a.   | n.a.   | <LOD   | <LOD   | <LOD   |
| 8:2 FTSA   | <LOD   | <LOD   | <LOD   | 0.0060 | <LOD   |
| 10:2 FTSA  | <LOD   | <LOD   | n.a.   | n.a.   | n.a.   |
| PFHxPA     | <LOD   | <LOD   | <LOD   | <LOD   | <LOD   |
| PFOPA      | n.a.   | n.a.   | n.a.   | n.a.   | n.a.   |
| PFDPa      | n.a.   | n.a.   | n.a.   | n.a.   | n.a.   |

|                      |       |       |       |       |       |
|----------------------|-------|-------|-------|-------|-------|
| 6:6 PFPiA            | <LOD  | <LOD  | <LOD  | <LOD  | <LOD  |
| 6:8 PFPiA            | n.a.  | n.a.  | n.a.  | n.a.  | n.a.  |
| 8:8 PFPiA            | n.a.  | n.a.  | n.a.  | n.a.  | n.a.  |
| 8:2 Cl-PFESA         | <LOD  | <LOD  | <LOD  | <LOD  | <LOD  |
| 6:2 Cl-PFESA         | <LOD  | <LOD  | <LOD  | <LOD  | <LOD  |
| ADONA                | 0.027 | 0.033 | 0.041 | 0.019 | <LOD  |
| HFPO-DA (GenX)       | n.a.  | n.a.  | n.a.  | n.a.  | n.a.  |
| N-MeFOSAA            | <LOD  | <LOD  | <LOQ  | <LOQ  | 0.030 |
| N-EtFOSAA            | <LOD  | <LOD  | <LOD  | <LOD  | 0.19  |
| diSAmPAP             | n.a.  | n.a.  | n.a.  | n.a.  | n.a.  |
| 6:2 monoPAP          | n.a.  | n.a.  | n.a.  | n.a.  | n.a.  |
| 8:2 monoPAP          | n.a.  | n.a.  | n.a.  | n.a.  | n.a.  |
| 10:2 monoPAP         | <LOD  | <LOD  | <LOD  | <LOD  | <LOD  |
| 6:2 diPAP            | <LOD  | <LOD  | <LOD  | <LOD  | <LOD  |
| 8:2 diPAP            | n.a.  | n.a.  | n.a.  | n.a.  | n.a.  |
| 6:2/8:2 diPAP        | n.a.  | n.a.  | n.a.  | n.a.  | n.a.  |
| 10:2 diPAP           | n.a.  | n.a.  | n.a.  | n.a.  | n.a.  |
| PFOS-branch $\Sigma$ | 0.40  | 0.33  | 0.52  | 0.37  | 1.22  |

153

154 Table S6: PFAS concentrations of the single maternal serum pool samples matS-P to matS-U in  
155 ng/mL (not concentrated value, so the concentrations represents the mean of each single sample in  
156 the respective pool) – the number in the “( )” represents the number of samples which were pooled  
157 together

| Summary of the concentrations [ng/mL] of pooled maternal serum from P-U |            |            |            |            |            |            |
|-------------------------------------------------------------------------|------------|------------|------------|------------|------------|------------|
| Compound                                                                | matS-P (3) | matS-Q (3) | matS-R (3) | matS-S (3) | matS-T (3) | matS-U (2) |
| PFBA                                                                    | <LOD       | <LOD       | <LOD       | <LOD       | <LOD       | <LOD       |
| PFPeA                                                                   | <LOD       | <LOD       | <LOD       | <LOD       | <LOD       | <LOD       |
| PFHxA                                                                   | <LOQ       | <LOQ       | <LOD       | <LOD       | <LOQ       | <LOD       |
| PFHpA                                                                   | 0.013      | 0.013      | <LOQ       | 0.021      | 0.031      | <LOQ       |
| PFOA                                                                    | 0.72       | 0.73       | 1.20       | 1.12       | 1.29       | 0.94       |
| PFNA                                                                    | 0.27       | 0.24       | 0.41       | 0.19       | 0.31       | 0.22       |
| PFDA                                                                    | 0.15       | 0.14       | 0.30       | 0.096      | 0.18       | 0.12       |

|                      |        |        |        |        |        |        |
|----------------------|--------|--------|--------|--------|--------|--------|
| PFUnDA               | 0.072  | 0.081  | 0.078  | 0.042  | 0.12   | 0.078  |
| PFD <sub>o</sub> DA  | 0.017  | <LOD   | <LOD   | <LOD   | 0.017  | 0.023  |
| PFT <sub>r</sub> DA  | n.a.   | n.a.   | n.a.   | n.a.   | n.a.   | n.a.   |
| PFTDA                | n.a.   | n.a.   | n.a.   | n.a.   | n.a.   | n.a.   |
| PFH <sub>x</sub> DA  | n.a.   | n.a.   | n.a.   | n.a.   | n.a.   | n.a.   |
| PFO <sub>c</sub> DA  | n.a.   | n.a.   | n.a.   | n.a.   | n.a.   | n.a.   |
| PFBS                 | 0.0074 | 0.0090 | 0.0042 | 0.017  | 0.021  | 0.0040 |
| PFPeS                | 0.0053 | 0.0034 | 0.0044 | 0.012  | 0.016  | 0.0037 |
| PFH <sub>x</sub> S   | 0.30   | 0.38   | 0.26   | 0.32   | 0.45   | 0.49   |
| PFH <sub>p</sub> S   | 0.043  | 0.031  | 0.020  | 0.033  | 0.042  | 0.061  |
| L-PFOS               | 1.20   | 0.96   | 1.21   | 0.76   | 1.38   | 2.07   |
| PFNS                 | <LOD   | <LOD   | <LOD   | <LOD   | <LOD   | <LOD   |
| PFDS                 | <LOD   | <LOD   | <LOD   | <LOD   | <LOD   | <LOD   |
| PFD <sub>o</sub> DS  | n.a.   | n.a.   | n.a.   | n.a.   | n.a.   | n.a.   |
| PFECHS               | 0.0043 | 0.0029 | 0.0034 | 0.0034 | 0.0050 | 0.0034 |
| FBSA                 | <LOD   | <LOD   | <LOD   | <LOD   | <LOD   | <LOD   |
| MeFBSA               | <LOD   | <LOD   | <LOD   | <LOD   | <LOD   | <LOD   |
| FH <sub>x</sub> SA   | <LOD   | <LOD   | <LOD   | <LOD   | <LOD   | <LOD   |
| MeFH <sub>x</sub> SA | <LOD   | <LOD   | <LOD   | <LOD   | <LOD   | <LOD   |
| FOSA                 | <LOD   | <LOD   | <LOD   | <LOD   | <LOD   | <LOD   |
| MeFOSA               | <LOD   | <LOD   | <LOD   | <LOD   | <LOD   | <LOD   |
| EtFOSA               | n.a.   | n.a.   | n.a.   | n.a.   | n.a.   | n.a.   |
| MeFOSE               | <LOD   | <LOD   | <LOD   | <LOD   | 0.14   | <LOD   |
| EtFOSE               | <LOD   | <LOD   | <LOD   | <LOD   | <LOD   | <LOD   |
| 3:3 FTCA             | <LOD   | <LOD   | <LOD   | <LOD   | <LOD   | <LOD   |
| 5:3 FTCA             | <LOD   | <LOD   | <LOD   | <LOD   | <LOD   | <LOD   |
| 7:3 FTCA             | <LOQ   | <LOQ   | 0.010  | <LOQ   | 0.0051 | <LOD   |
| 6:2 FTUCA            | <LOD   | <LOD   | 0.0054 | <LOD   | <LOQ   | <LOD   |
| 8:2 FTUCA            | <LOD   | <LOD   | <LOD   | <LOD   | <LOD   | <LOD   |
| 10:2 FTUCA           | <LOD   | <LOD   | <LOD   | <LOD   | <LOD   | <LOD   |
| 4:2 FTSA             | <LOD   | <LOD   | <LOD   | <LOD   | <LOD   | <LOD   |
| 6:2 FTSA             | 0.0020 | <LOD   | 0.0057 | <LOD   | <LOD   | <LOD   |

|                      |       |       |        |      |       |      |
|----------------------|-------|-------|--------|------|-------|------|
| 8:2 FTSA             | 0.016 | <LOD  | <LOD   | <LOD | <LOD  | <LOD |
| 10:2 FTSA            | n.a.  | n.a.  | n.a.   | n.a. | n.a.  | n.a. |
| PFHxPA               | <LOD  | <LOD  | <LOD   | <LOD | <LOD  | <LOD |
| PFOPA                | n.a.  | n.a.  | n.a.   | n.a. | n.a.  | n.a. |
| PFDPA                | n.a.  | n.a.  | n.a.   | n.a. | n.a.  | n.a. |
| 6:6 PFPiA            | <LOD  | <LOD  | <LOD   | <LOD | <LOD  | <LOD |
| 6:8 PFPiA            | n.a.  | n.a.  | n.a.   | n.a. | n.a.  | n.a. |
| 8:8 PFPiA            | n.a.  | n.a.  | n.a.   | n.a. | n.a.  | n.a. |
| 8:2 CI-PFESA         | <LOD  | <LOD  | <LOD   | <LOD | <LOD  | <LOD |
| 6:2 CI-PFESA         | <LOD  | <LOD  | <LOD   | <LOD | <LOD  | <LOD |
| ADONA                | <LOD  | <LOD  | 0.0072 | <LOD | 0.020 | <LOD |
| HFPO-DA (GenX)       | n.a.  | n.a.  | n.a.   | n.a. | n.a.  | n.a. |
| MeFOSAA              | 0.011 | 0.017 | <LOD   | <LOD | <LOD  | <LOD |
| EtFOSAA              | <LOD  | <LOD  | <LOD   | <LOD | <LOD  | <LOD |
| diSAmpPAP            | n.a.  | n.a.  | n.a.   | n.a. | n.a.  | n.a. |
| 6:2 monoPAP          | n.a.  | n.a.  | n.a.   | n.a. | n.a.  | n.a. |
| 8:2 monoPAP          | n.a.  | n.a.  | n.a.   | n.a. | n.a.  | n.a. |
| 10:2 monoPAP         | <LOD  | <LOD  | <LOD   | <LOD | <LOD  | <LOD |
| 6:2 diPAP            | <LOD  | <LOD  | <LOD   | <LOD | <LOD  | <LOD |
| 8:2 diPAP            | n.a.  | n.a.  | n.a.   | n.a. | n.a.  | n.a. |
| 6:2/8:2 diPAP        | n.a.  | n.a.  | n.a.   | n.a. | n.a.  | n.a. |
| 10:2 diPAP           | n.a.  | n.a.  | n.a.   | n.a. | n.a.  | n.a. |
| PFOS-branch $\Sigma$ | 0.35  | 0.21  | 0.28   | 0.25 | 0.34  | 0.68 |

158

159

160

161

162 Table S7: PFAS concentrations of the placental pool tissue samples plaT-A to plaT-E in ng/g (not  
 163 concentrated value, so the concentrations represents the mean of each single sample in the  
 164 respective pool) – the number in the “( )” represents the number of samples which were pooled  
 165 together

| Summary of the concentrations [ng/g] of pooled placental tissue from A-E |            |            |            |            |            |
|--------------------------------------------------------------------------|------------|------------|------------|------------|------------|
| Compound                                                                 | plaT-A (3) | plaT-B (2) | plaT-C (3) | plaT-D (3) | plaT-E (1) |
| PFBA                                                                     | 0.031      | 0.029      | <LOD       | 0.053      | <LOD       |
| PFPeA                                                                    | <LOD       | <LOD       | <LOD       | <LOD       | <LOD       |
| PFHxA                                                                    | <LOD       | <LOD       | <LOD       | <LOD       | <LOD       |
| PFHpA                                                                    | <LOD       | 0.0095     | 0.0077     | 0.013      | 0.0038     |
| PFOA                                                                     | 0.35       | 0.31       | 0.29       | 0.47       | 0.14       |
| PFNA                                                                     | 0.26       | 0.056      | 0.085      | 0.17       | 0.11       |
| PFDA                                                                     | 0.077      | 0.031      | 0.047      | 0.069      | 0.12       |
| PFUnDA                                                                   | 0.11       | 0.024      | 0.035      | 0.043      | 0.10       |
| PFDoDA                                                                   | 0.027      | 0.013      | 0.013      | 0.022      | 0.070      |
| PFTTrDA                                                                  | 0.032      | 0.016      | 0.018      | 0.0049     | 0.032      |
| PFTDA                                                                    | 0.029      | 0.023      | 0.020      | 0.028      | 0.090      |
| PFHxDA                                                                   | n.a.       | n.a.       | n.a.       | n.a.       | n.a.       |
| PFOcDA                                                                   | n.a.       | n.a.       | n.a.       | n.a.       | n.a.       |
| PFBS                                                                     | <LOD       | <LOD       | <LOD       | <LOD       | <LOD       |
| PFPeS                                                                    | <LOD       | <LOD       | <LOD       | <LOD       | <LOD       |
| PFHxS                                                                    | 0.080      | 0.080      | 0.098      | 0.13       | 0.060      |
| PFHpS                                                                    | 0.0076     | 0.013      | 0.012      | 0.016      | 0.012      |
| L-PFOS                                                                   | 0.27       | 0.41       | 0.44       | 0.52       | 0.98       |
| PFNS                                                                     | <LOD       | <LOD       | n.a.       | n.a.       | n.a.       |
| PFDS                                                                     | <LOD       | <LOD       | <LOD       | <LOD       | 0.0043     |
| PFDoDS                                                                   | 0.0006     | <LOD       | <LOD       | <LOD       | <LOD       |
| PFECHS                                                                   | n.a.       | n.a.       | n.a.       | n.a.       | n.a.       |
| FBSA                                                                     | <LOD       | <LOD       | <LOD       | <LOD       | <LOD       |
| MeFBSA                                                                   | <LOD       | <LOD       | <LOD       | <LOD       | <LOD       |
| FHxSA                                                                    | <LOD       | <LOD       | <LOD       | <LOD       | <LOD       |
| MeFHxSA                                                                  | <LOD       | <LOD       | <LOD       | <LOD       | <LOD       |

|                |        |        |        |        |        |
|----------------|--------|--------|--------|--------|--------|
| FOSA           | n.a.   | n.a.   | n.a.   | n.a.   | n.a.   |
| MeFOSA         | n.a.   | n.a.   | n.a.   | n.a.   | n.a.   |
| EtFOSA         | n.a.   | n.a.   | n.a.   | n.a.   | n.a.   |
| MeFOSE         | n.a.   | n.a.   | n.a.   | n.a.   | n.a.   |
| EtFOSE         | n.a.   | n.a.   | n.a.   | n.a.   | n.a.   |
| 3:3 FTCA       | <LOD   | 0.0007 | 0.0006 | 0.0014 | <LOD   |
| 5:3 FTCA       | <LOD   | <LOD   | <LOD   | 0.0013 | <LOD   |
| 7:3 FTCA       | 0.012  | 0.012  | 0.0027 | 0.035  | 0.011  |
| 6:2 FTUCA      | <LOD   | <LOD   | <LOD   | <LOD   | <LOD   |
| 8:2 FTUCA      | n.a.   | n.a.   | n.a.   | n.a.   | n.a.   |
| 10:2 FTUCA     | n.a.   | n.a.   | n.a.   | n.a.   | n.a.   |
| 4:2 FTSA       | 0.0098 | 0.0054 | 0.0065 | 0.0088 | 0.0028 |
| 6:2 FTSA       | <LOD   | <LOD   | <LOD   | <LOD   | <LOD   |
| 8:2 FTSA       | 0.013  | 0.0068 | <LOD   | <LOD   | 0.0042 |
| 10:2 FTSA      | n.a.   | n.a.   | n.a.   | n.a.   | n.a.   |
| PFHxPA         | <LOD   | <LOD   | <LOD   | <LOD   | <LOD   |
| PFOPA          | n.a.   | n.a.   | n.a.   | n.a.   | n.a.   |
| PFDPA          | n.a.   | n.a.   | n.a.   | n.a.   | n.a.   |
| 6:6 PFPiA      | <LOD   | <LOD   | <LOD   | <LOD   | <LOD   |
| 6:8 PFPiA      | n.a.   | n.a.   | n.a.   | n.a.   | n.a.   |
| 8:8 PFPiA      | n.a.   | n.a.   | n.a.   | n.a.   | n.a.   |
| 8:2 CI-PFESA   | <LOD   | <LOD   | <LOD   | <LOD   | <LOD   |
| 6:2 CI-PFESA   | n.a.   | n.a.   | n.a.   | n.a.   | n.a.   |
| ADONA          | <LOD   | <LOD   | <LOD   | <LOD   | <LOD   |
| HFPO-DA (GenX) | n.a.   | n.a.   | n.a.   | n.a.   | n.a.   |
| MeFOSAA        | 0.0076 | 0.0088 | 0.0051 | 0.017  | 0.0044 |
| EtFOSAA        | <LOD   | 0.0062 | 0.0036 | 0.0066 | 0.0033 |
| diSAmPAP       | <LOD   | <LOD   | <LOD   | <LOD   | <LOD   |
| 6:2 monoPAP    | n.a.   | n.a.   | n.a.   | n.a.   | n.a.   |
| 8:2 monoPAP    | n.a.   | n.a.   | n.a.   | n.a.   | n.a.   |
| 10:2 monoPAP   | n.a.   | n.a.   | n.a.   | n.a.   | n.a.   |
| 6:2 diPAP      | <LOD   | <LOD   | <LOD   | 0.0049 | <LOD   |

|                      |       |       |       |        |      |
|----------------------|-------|-------|-------|--------|------|
| 8:2 diPAP            | <LOD  | <LOD  | <LOD  | 0.0022 | <LOD |
| 6:2/8:2 diPAP        | <LOD  | <LOD  | <LOD  | <LOD   | <LOD |
| 10:2 diPAP           | n.a.  | n.a.  | n.a.  | n.a.   | n.a. |
| PFOS-branch $\Sigma$ | 0.066 | 0.096 | 0.081 | 0.12   | 0.10 |

166

167

168 Table S8: PFAS concentrations of the placental pool tissue samples plaT-F to plaT-J in ng/g (not  
169 concentrated value, so the concentrations represents the mean of each single sample in the  
170 respective pool) – the number in the “( )” represents the number of samples which were pooled  
171 together

| Summary of the concentrations [ng/g] of pooled placental tissue from F-J |            |            |            |            |            |
|--------------------------------------------------------------------------|------------|------------|------------|------------|------------|
| Compound                                                                 | plaT-F (4) | plaT-G (2) | plaT-H (3) | plaT-I (1) | plaT-J (2) |
| PFBA                                                                     | 0.021      | <LOD       | <LOD       | <LOD       | <LOD       |
| PFPeA                                                                    | <LOD       | <LOD       | <LOD       | <LOD       | <LOD       |
| PFHxA                                                                    | <LOD       | <LOD       | <LOD       | <LOD       | <LOD       |
| PFHpA                                                                    | 0.0048     | <LOD       | 0.0090     | 0.010      | 0.019      |
| PFOA                                                                     | 0.14       | 0.21       | 0.36       | 1.00       | 1.15       |
| PFNA                                                                     | 0.058      | 0.073      | 0.16       | 0.25       | 0.16       |
| PFDA                                                                     | 0.026      | 0.041      | 0.12       | 0.087      | 0.095      |
| PFUnDA                                                                   | 0.020      | 0.030      | 0.061      | 0.035      | 0.073      |
| PFDoDA                                                                   | 0.0099     | 0.013      | 0.026      | 0.013      | 0.050      |
| PFTTrDA                                                                  | 0.0099     | 0.0091     | 0.019      | 0.0035     | 0.064      |
| PFTDA                                                                    | 0.021      | 0.021      | 0.039      | 0.017      | 0.11       |
| PFHxDA                                                                   | n.a.       | n.a.       | n.a.       | n.a.       | n.a.       |
| PFOcDA                                                                   | n.a.       | n.a.       | n.a.       | n.a.       | n.a.       |
| PFBS                                                                     | <LOD       | <LOD       | <LOD       | <LOD       | <LOD       |
| PFPeS                                                                    | <LOD       | <LOD       | <LOD       | <LOD       | <LOD       |
| PFHxS                                                                    | 0.037      | 0.17       | 0.059      | 0.15       | 0.18       |
| PFHpS                                                                    | 0.0058     | 0.026      | 0.0075     | 0.020      | 0.025      |
| L-PFOS                                                                   | 0.28       | 0.86       | 0.39       | 0.49       | 1.07       |
| PFNS                                                                     | n.a.       | n.a.       | n.a.       | n.a.       | n.a.       |

|                     |        |        |        |        |        |
|---------------------|--------|--------|--------|--------|--------|
| PFDS                | <LOD   | <LOD   | <LOD   | <LOD   | <LOD   |
| PFD <sub>o</sub> DS | <LOD   | <LOD   | <LOD   | <LOD   | <LOD   |
| PFECHS              | n.a.   | n.a.   | n.a.   | n.a.   | n.a.   |
| FBSA                | <LOD   | <LOD   | <LOD   | <LOD   | <LOD   |
| MeFBSA              | <LOD   | <LOD   | <LOD   | <LOD   | <LOD   |
| FHxSA               | <LOD   | <LOD   | <LOD   | <LOD   | <LOD   |
| MeFHxSA             | <LOD   | <LOD   | <LOD   | <LOD   | <LOD   |
| FOSA                | n.a.   | n.a.   | n.a.   | n.a.   | n.a.   |
| MeFOSA              | n.a.   | n.a.   | n.a.   | n.a.   | n.a.   |
| EtFOSA              | n.a.   | n.a.   | n.a.   | n.a.   | n.a.   |
| MeFOSE              | n.a.   | n.a.   | n.a.   | n.a.   | n.a.   |
| EtFOSE              | n.a.   | n.a.   | n.a.   | n.a.   | n.a.   |
| 3:3 FTCA            | 0.0005 | <LOD   | <LOD   | <LOD   | <LOD   |
| 5:3 FTCA            | <LOD   | <LOD   | <LOD   | <LOD   | <LOD   |
| 7:3 FTCA            | 0.0050 | 0.021  | 0.011  | 0.0081 | 0.017  |
| 6:2 FTUCA           | <LOD   | <LOD   | <LOD   | <LOD   | <LOD   |
| 8:2 FTUCA           | n.a.   | n.a.   | n.a.   | n.a.   | n.a.   |
| 10:2 FTUCA          | n.a.   | n.a.   | n.a.   | n.a.   | n.a.   |
| 4:2 FTSA            | 0.0047 | 0.0023 | 0.0058 | 0.0055 | 0.0073 |
| 6:2 FTSA            | <LOD   | <LOD   | <LOD   | <LOD   | <LOD   |
| 8:2 FTSA            | 0.0047 | 0.0031 | 0.0022 | <LOD   | 0.0078 |
| 10:2 FTSA           | n.a.   | n.a.   | n.a.   | n.a.   | n.a.   |
| PFHxPA              | <LOD   | <LOD   | <LOD   | <LOD   | <LOD   |
| PFOPA               | n.a.   | n.a.   | n.a.   | n.a.   | n.a.   |
| PFDPA               | n.a.   | n.a.   | n.a.   | n.a.   | n.a.   |
| 6:6 PFPiA           | <LOD   | <LOD   | <LOD   | <LOD   | <LOD   |
| 6:8 PFPiA           | n.a.   | n.a.   | n.a.   | n.a.   | n.a.   |
| 8:8 PFPiA           | n.a.   | n.a.   | n.a.   | n.a.   | n.a.   |
| 8:2 CI-PFESA        | <LOD   | <LOD   | <LOD   | <LOD   | <LOD   |
| 6:2 CI-PFESA        | n.a.   | n.a.   | n.a.   | n.a.   | n.a.   |
| ADONA               | <LOD   | <LOD   | <LOD   | <LOD   | <LOD   |
| HFPO-DA (GenX)      | n.a.   | n.a.   | n.a.   | n.a.   | n.a.   |



|                      |        |        |        |        |        |
|----------------------|--------|--------|--------|--------|--------|
| MeFOSAA              | 0.028  | 0.038  | 0.0052 | 0.0058 | 0.0048 |
| EtFOSAA              | 0.0027 | 0.0092 | <LOD   | 0.0035 | <LOD   |
| diSAmPAP             | <LOD   | <LOD   | <LOD   | <LOD   | <LOD   |
| 6:2 monoPAP          | n.a.   | n.a.   | n.a.   | n.a.   | n.a.   |
| 8:2 monoPAP          | n.a.   | n.a.   | n.a.   | n.a.   | n.a.   |
| 10:2 monoPAP         | n.a.   | n.a.   | n.a.   | n.a.   | n.a.   |
| 6:2 diPAP            | <LOD   | <LOD   | 0.038  | <LOD   | <LOD   |
| 8:2 diPAP            | <LOD   | <LOD   | <LOD   | <LOD   | <LOD   |
| 6:2/8:2 diPAP        | <LOD   | <LOD   | <LOD   | <LOD   | <LOD   |
| 10:2 diPAP           | n.a.   | n.a.   | n.a.   | n.a.   | n.a.   |
| PFOS-branch $\Sigma$ | 0.051  | 0.10   | 0.050  | 0.15   | 0.13   |

172

173

174 Table S9: PFAS concentrations of the placental pool tissue samples plaT-K to plaT-M in ng/g (not  
175 concentrated value, so the concentrations represents the mean of each single sample in the  
176 respective pool) – the number in the “( )” represents the number of samples which were pooled  
177 together

| Summary of the concentrations [ng/g] of pooled placental tissue from K-M |            |            |            |
|--------------------------------------------------------------------------|------------|------------|------------|
| Compound                                                                 | plaT-K (3) | plaT-L (3) | plaT-M (2) |
| PFBA                                                                     | <LOD       | <LOD       | 0.032      |
| PFPeA                                                                    | <LOD       | <LOD       | <LOD       |
| PFHxA                                                                    | <LOD       | <LOD       | <LOD       |
| PFHpA                                                                    | <LOD       | 0.014      | 0.016      |
| PFOA                                                                     | 0.36       | 0.37       | 0.55       |
| PFNA                                                                     | 0.13       | 0.077      | 0.099      |
| PFDA                                                                     | 0.082      | 0.034      | 0.053      |
| PFUnDA                                                                   | 0.073      | 0.032      | 0.031      |
| PFDoDA                                                                   | 0.028      | 0.010      | 0.018      |
| PFTTrDA                                                                  | 0.033      | 0.021      | <LOD       |
| PFTDA                                                                    | 0.034      | 0.019      | 0.055      |
| PFHxDA                                                                   | n.a.       | n.a.       | n.a.       |

|            |        |        |        |
|------------|--------|--------|--------|
| PFOcDA     | n.a.   | n.a.   | n.a.   |
| PFBS       | <LOD   | <LOD   | <LOD   |
| PFPeS      | <LOD   | <LOD   | <LOD   |
| PFHxS      | 0.084  | 0.11   | 0.14   |
| PFHpS      | 0.0065 | 0.010  | 0.013  |
| L-PFOS     | 0.47   | 0.28   | 0.50   |
| PFNS       | n.a.   | n.a.   | n.a.   |
| PFDS       | <LOD   | <LOD   | <LOD   |
| PFDoDS     | <LOD   | <LOD   | <LOD   |
| PFECHS     | n.a.   | n.a.   | n.a.   |
| FBSA       | <LOD   | <LOD   | <LOD   |
| MeFBSA     | <LOD   | <LOD   | <LOD   |
| FHxSA      | <LOD   | <LOD   | <LOD   |
| MeFHxSA    | <LOD   | <LOD   | <LOD   |
| FOSA       | n.a.   | n.a.   | n.a.   |
| MeFOSA     | n.a.   | n.a.   | n.a.   |
| EtFOSA     | n.a.   | n.a.   | n.a.   |
| MeFOSE     | n.a.   | n.a.   | n.a.   |
| EtFOSE     | n.a.   | n.a.   | n.a.   |
| 3:3 FTCA   | <LOD   | <LOD   | <LOD   |
| 5:3 FTCA   | <LOD   | <LOD   | <LOD   |
| 7:3 FTCA   | 0.015  | 0.011  | 0.015  |
| 6:2 FTUCA  | <LOD   | <LOD   | <LOD   |
| 8:2 FTUCA  | n.a.   | n.a.   | n.a.   |
| 10:2 FTUCA | n.a.   | n.a.   | n.a.   |
| 4:2 FTSA   | 0.011  | 0.0055 | 0.0089 |
| 6:2 FTSA   | <LOD   | <LOD   | <LOD   |
| 8:2 FTSA   | <LOD   | <LOD   | <LOD   |
| 10:2 FTSA  | n.a.   | n.a.   | n.a.   |
| PFHxPA     | <LOD   | <LOD   | <LOD   |
| PFOPA      | n.a.   | n.a.   | n.a.   |
| PFDPA      | n.a.   | n.a.   | n.a.   |

|                      |        |        |       |
|----------------------|--------|--------|-------|
| 6:6 PFPiA            | <LOD   | <LOD   | <LOD  |
| 6:8 PFPiA            | n.a.   | n.a.   | n.a.  |
| 8:8 PFPiA            | n.a.   | n.a.   | n.a.  |
| 8:2 Cl-PFESA         | <LOD   | <LOD   | <LOD  |
| 6:2 Cl-PFESA         | n.a.   | n.a.   | n.a.  |
| ADONA                | <LOD   | <LOD   | <LOD  |
| HFPO-DA (GenX)       | n.a.   | n.a.   | n.a.  |
| MeFOSAA              | 0.0069 | 0.0050 | 0.012 |
| EtFOSAA              | 0.011  | 0.0027 | <LOD  |
| diSAmPAP             | <LOD   | <LOD   | <LOD  |
| 6:2 monoPAP          | n.a.   | n.a.   | n.a.  |
| 8:2 monoPAP          | n.a.   | n.a.   | n.a.  |
| 10:2 monoPAP         | n.a.   | n.a.   | n.a.  |
| 6:2 diPAP            | <LOD   | <LOD   | <LOD  |
| 8:2 diPAP            | <LOD   | <LOD   | <LOD  |
| 6:2/8:2 diPAP        | <LOD   | <LOD   | <LOD  |
| 10:2 diPAP           | n.a.   | n.a.   | n.a.  |
| PFOS-branch $\Sigma$ | 0.090  | 0.061  | 0.12  |

178

179

180 Table S10: PFAS concentrations of the cord serum pool samples cordS-B to cordS-H in ng/mL (not  
181 concentrated value, so the concentrations represents the mean of each single sample in the  
182 respective pool) – the number in the “( )” represents the number of samples which were pooled  
183 together

| Summary of the concentrations [ng/mL] of pooled cord serum from B-H |             |             |             |             |             |
|---------------------------------------------------------------------|-------------|-------------|-------------|-------------|-------------|
| Compound                                                            | cordS-B (2) | cordS-C (3) | cordS-D (3) | cordS-E (1) | cordS-H (3) |
| PFBA                                                                | <LOD        | <LOD        | <LOD        | <LOD        | <LOD        |
| PFPeA                                                               | <LOD        | <LOD        | <LOD        | <LOD        | <LOD        |
| PFHxA                                                               | <LOD        | <LOD        | <LOD        | <LOD        | 0.011       |
| PFHpA                                                               | 0.045       | 0.014       | 0.026       | <LOD        | 0.019       |
| PFOA                                                                | 1.40        | 0.72        | 0.84        | 0.093       | 0.81        |

|            |        |        |        |       |        |
|------------|--------|--------|--------|-------|--------|
| PFNA       | 0.13   | 0.12   | 0.17   | 0.040 | 0.21   |
| PFDA       | 0.047  | 0.037  | 0.040  | <LOD  | 0.065  |
| PFUnDA     | 0.020  | 0.017  | 0.025  | 0.039 | 0.037  |
| PFDoDA     | <LOD   | 0.010  | 0.010  | <LOD  | 0.015  |
| PFTTrDA    | n.a.   | n.a.   | n.a.   | n.a.  | n.a.   |
| PFTDA      | n.a.   | n.a.   | n.a.   | n.a.  | n.a.   |
| PFHxDA     | n.a.   | n.a.   | n.a.   | n.a.  | n.a.   |
| PFOcDA     | n.a.   | n.a.   | n.a.   | n.a.  | n.a.   |
| PFBS       | 0.0076 | 0.0064 | 0.0020 | <LOD  | 0.0044 |
| PFPeS      | 0.0032 | 0.0064 | 0.0025 | <LOD  | 0.0034 |
| PFHxS      | 0.23   | 0.24   | 0.14   | <LOQ  | 0.18   |
| PFHpS      | <LOD   | 0.017  | 0.010  | <LOQ  | 0.017  |
| L-PFOS     | 0.32   | 0.34   | 0.29   | 0.13  | 0.35   |
| PFNS       | <LOD   | <LOD   | <LOD   | <LOD  | <LOD   |
| PFDS       | <LOD   | <LOD   | <LOD   | <LOD  | <LOD   |
| PFDoDS     | n.a.   | n.a.   | n.a.   | n.a.  | n.a.   |
| PFECHS     | 0.0019 | 0.0023 | 0.0027 | <LOD  | 0.0075 |
| FBSA       | <LOD   | <LOD   | <LOD   | <LOD  | <LOD   |
| MeFBSA     | <LOD   | <LOD   | <LOD   | <LOD  | <LOD   |
| FHxSA      | <LOD   | <LOD   | <LOD   | <LOD  | <LOD   |
| MeFHxSA    | <LOD   | <LOD   | <LOD   | <LOD  | <LOD   |
| FOSA       | <LOD   | <LOD   | <LOD   | <LOD  | <LOD   |
| MeFOSA     | <LOD   | <LOD   | <LOD   | <LOD  | <LOD   |
| EtFOSA     | n.a.   | n.a.   | n.a.   | n.a.  | n.a.   |
| MeFOSE     | <LOD   | <LOD   | <LOD   | <LOD  | <LOD   |
| EtFOSE     | <LOD   | <LOD   | <LOD   | <LOD  | <LOD   |
| 3:3 FTCA   | <LOD   | <LOD   | <LOD   | <LOD  | <LOD   |
| 5:3 FTCA   | <LOD   | <LOD   | <LOD   | <LOD  | <LOD   |
| 7:3 FTCA   | <LOQ   | <LOD   | <LOD   | <LOD  | <LOQ   |
| 6:2 FTUCA  | <LOD   | <LOD   | <LOD   | <LOD  | <LOD   |
| 8:2 FTUCA  | <LOD   | <LOD   | <LOD   | <LOD  | <LOD   |
| 10:2 FTUCA | <LOD   | <LOD   | <LOD   | <LOD  | <LOD   |

|                      |       |        |        |       |        |
|----------------------|-------|--------|--------|-------|--------|
| 4:2 FTSA             | <LOD  | <LOD   | <LOD   | <LOD  | <LOD   |
| 6:2 FTSA             | <LOQ  | <LOD   | 0.0070 | <LOD  | 0.0072 |
| 8:2 FTSA             | <LOD  | <LOD   | <LOD   | <LOD  | <LOD   |
| 10:2 FTSA            | n.a.  | n.a.   | n.a.   | n.a.  | n.a.   |
| PFHxPA               | <LOD  | <LOD   | <LOD   | <LOD  | <LOD   |
| PFOPA                | n.a.  | n.a.   | n.a.   | n.a.  | n.a.   |
| PFDPA                | n.a.  | n.a.   | n.a.   | n.a.  | n.a.   |
| 6:6 PFPiA            | <LOD  | <LOD   | <LOD   | <LOD  | <LOD   |
| 6:8 PFPiA            | n.a.  | n.a.   | n.a.   | n.a.  | n.a.   |
| 8:8 PFPiA            | n.a.  | n.a.   | n.a.   | n.a.  | n.a.   |
| 8:2 CI-PFESA         | <LOD  | <LOD   | <LOD   | <LOD  | <LOD   |
| 6:2 CI-PFESA         | <LOD  | <LOD   | <LOD   | <LOD  | <LOD   |
| ADONA                | 0.014 | 0.0076 | <LOD   | <LOD  | <LOD   |
| HFPO-DA (GenX)       | n.a.  | n.a.   | n.a.   | n.a.  | n.a.   |
| MeFOSAA              | <LOD  | <LOQ   | 0.011  | <LOD  | 0.022  |
| EtFOSAA              | <LOD  | <LOD   | <LOD   | <LOD  | <LOQ   |
| diSAmPAP             | n.a.  | n.a.   | n.a.   | n.a.  | n.a.   |
| 6:2 monoPAP          | n.a.  | n.a.   | n.a.   | n.a.  | n.a.   |
| 8:2 monoPAP          | n.a.  | n.a.   | n.a.   | n.a.  | n.a.   |
| 10:2 monoPAP         | <LOD  | <LOD   | <LOD   | <LOD  | <LOD   |
| 6:2 diPAP            | <LOD  | <LOD   | <LOD   | <LOD  | <LOD   |
| 8:2 diPAP            | n.a.  | n.a.   | n.a.   | n.a.  | n.a.   |
| 6:2/8:2 diPAP        | n.a.  | n.a.   | n.a.   | n.a.  | n.a.   |
| 10:2 diPAP           | n.a.  | n.a.   | n.a.   | n.a.  | n.a.   |
| PFOS-branch $\Sigma$ | 0.18  | 0.17   | 0.17   | 0.011 | 0.14   |

184

185

186 Table S11: PFAS concentrations of the cord serum pool samples cordS-K to cordS-U in ng/mL (not  
 187 concentrated value, so the concentrations represents the mean of each single sample in the  
 188 respective pool) – the number in the “( )” represents the number of samples which were pooled  
 189 together

| Summary of the concentrations [ng/mL] of pooled cord serum from K-U |             |             |             |             |             |             |
|---------------------------------------------------------------------|-------------|-------------|-------------|-------------|-------------|-------------|
| Compound                                                            | cordS-K (3) | cordS-L (3) | cordS-N (3) | cordS-O (2) | cordS-S (3) | cordS-U (2) |
| PFBA                                                                | <LOD        | <LOD        | <LOD        | <LOD        | <LOD        | <LOD        |
| PFPeA                                                               | <LOD        | <LOD        | <LOD        | <LOD        | <LOD        | <LOD        |
| PFHxA                                                               | 0.027       | <LOD        | <LOD        | <LOD        | <LOD        | <LOD        |
| PFHpA                                                               | 0.032       | 0.021       | 0.070       | 0.061       | 0.022       | 0.0065      |
| PFOA                                                                | 1.42        | 0.75        | 0.86        | 1.08        | 0.89        | 0.54        |
| PFNA                                                                | 0.29        | 0.084       | 0.11        | 0.23        | 0.13        | 0.098       |
| PFDA                                                                | 0.090       | 0.026       | 0.038       | 0.067       | 0.040       | 0.046       |
| PFUnDA                                                              | 0.073       | 0.026       | 0.021       | 0.047       | 0.027       | 0.046       |
| PFDoDA                                                              | 0.013       | <LOD        | <LOD        | <LOD        | <LOQ        | <LOQ        |
| PFTTrDA                                                             | n.a.        | n.a.        | n.a.        | n.a.        | n.a.        | n.a.        |
| PFTDA                                                               | n.a.        | n.a.        | n.a.        | n.a.        | n.a.        | n.a.        |
| PFHxDA                                                              | n.a.        | n.a.        | n.a.        | n.a.        | n.a.        | n.a.        |
| PFOcDA                                                              | n.a.        | n.a.        | n.a.        | n.a.        | n.a.        | n.a.        |
| PFBS                                                                | 0.0084      | 0.0060      | 0.0099      | <LOD        | 0.0094      | 0.0046      |
| PFPeS                                                               | 0.0081      | 0.0050      | 0.0053      | 0.0054      | 0.0023      | <LOD        |
| PFHxS                                                               | 0.34        | 0.26        | 0.20        | 0.27        | 0.23        | 0.28        |
| PFHpS                                                               | 0.026       | 0.019       | 0.014       | 0.037       | 0.012       | 0.020       |
| L-PFOS                                                              | 0.62        | 0.21        | 0.31        | 0.84        | 0.34        | 0.47        |
| PFNS                                                                | <LOD        | <LOD        | <LOD        | <LOD        | <LOD        | <LOD        |
| PFDS                                                                | <LOD        | <LOD        | <LOD        | <LOD        | <LOD        | <LOD        |
| PFDoDS                                                              | n.a.        | n.a.        | n.a.        | n.a.        | n.a.        | n.a.        |
| PFECHS                                                              | 0.0027      | 0.0032      | 0.0016      | 0.0022      | 0.0019      | < LOQ       |
| FBSA                                                                | <LOD        | <LOD        | <LOD        | <LOD        | <LOD        | <LOD        |
| MeFBSA                                                              | <LOD        | <LOD        | <LOD        | <LOD        | <LOD        | <LOD        |
| FHxSA                                                               | <LOD        | <LOD        | <LOD        | <LOD        | <LOD        | <LOD        |
| MeFHxSA                                                             | <LOD        | <LOD        | <LOD        | <LOD        | <LOD        | <LOD        |

|                |        |        |        |        |        |        |
|----------------|--------|--------|--------|--------|--------|--------|
| FOSA           | <LOD   | <LOD   | <LOD   | <LOD   | <LOD   | <LOD   |
| MeFOSA         | <LOD   | <LOD   | <LOD   | <LOD   | <LOD   | <LOD   |
| EtFOSA         | n.a.   | n.a.   | n.a.   | n.a.   | n.a.   | n.a.   |
| MeFOSE         | <LOD   | <LOD   | <LOD   | <LOD   | <LOD   | <LOD   |
| EtFOSE         | <LOD   | <LOD   | <LOD   | <LOD   | <LOD   | <LOD   |
| 3:3 FTCA       | <LOD   | <LOD   | <LOD   | <LOD   | <LOD   | <LOD   |
| 5:3 FTCA       | <LOD   | <LOD   | <LOD   | <LOD   | <LOD   | <LOD   |
| 7:3 FTCA       | 0.0050 | <LOD   | <LOD   | <LOD   | <LOQ   | <LOD   |
| 6:2 FTUCA      | <LOD   | <LOD   | <LOD   | <LOD   | <LOD   | <LOD   |
| 8:2 FTUCA      | <LOD   | <LOD   | <LOD   | <LOD   | <LOD   | <LOD   |
| 10:2 FTUCA     | <LOD   | <LOD   | <LOD   | <LOD   | <LOD   | <LOD   |
| 4:2 FTSA       | <LOD   | <LOD   | <LOD   | <LOD   | <LOD   | <LOD   |
| 6:2 FTSA       | 0.013  | 0.0072 | 0.0045 | 0.010  | 0.0070 | 0.0065 |
| 8:2 FTSA       | <LOD   | <LOD   | <LOD   | <LOD   | <LOD   | <LOD   |
| 10:2 FTSA      | n.a.   | n.a.   | n.a.   | n.a.   | n.a.   | n.a.   |
| PFHxPA         | <LOD   | <LOD   | <LOD   | <LOD   | <LOD   | <LOD   |
| PFOPA          | n.a.   | n.a.   | n.a.   | n.a.   | n.a.   | n.a.   |
| PFDPA          | n.a.   | n.a.   | n.a.   | n.a.   | n.a.   | n.a.   |
| 6:6 PFPiA      | <LOD   | <LOD   | <LOD   | <LOD   | <LOD   | <LOD   |
| 6:8 PFPiA      | n.a.   | n.a.   | n.a.   | n.a.   | n.a.   | n.a.   |
| 8:8 PFPiA      | n.a.   | n.a.   | n.a.   | n.a.   | n.a.   | n.a.   |
| 8:2 CI-PFESA   | <LOD   | <LOD   | <LOD   | <LOD   | <LOD   | <LOD   |
| 6:2 CI-PFESA   | <LOD   | <LOD   | <LOD   | <LOD   | <LOD   | <LOD   |
| ADONA          | 0.021  | 0.027  | 0.027  | 0.0094 | 0.0039 | 0.0053 |
| HFPO-DA (GenX) | n.a.   | n.a.   | n.a.   | n.a.   | n.a.   | n.a.   |
| MeFOSAA        | <LOD   | <LOD   | 0.0051 | 0.016  | <LOD   | <LOD   |
| EtFOSAA        | <LOD   | <LOD   | <LOD   | 0.17   | <LOD   | <LOD   |
| diSAmPAP       | n.a.   | n.a.   | n.a.   | n.a.   | n.a.   | n.a.   |
| 6:2 monoPAP    | n.a.   | n.a.   | n.a.   | n.a.   | n.a.   | n.a.   |
| 8:2 monoPAP    | n.a.   | n.a.   | n.a.   | n.a.   | n.a.   | n.a.   |
| 10:2 monoPAP   | <LOD   | <LOD   | <LOD   | <LOD   | <LOD   | <LOD   |
| 6:2 diPAP      | <LOD   | <LOD   | <LOD   | <LOD   | <LOD   | <LOD   |

|                      |      |      |      |      |      |      |
|----------------------|------|------|------|------|------|------|
| 8:2 diPAP            | n.a. | n.a. | n.a. | n.a. | n.a. | n.a. |
| 6:2/8:2 diPAP        | n.a. | n.a. | n.a. | n.a. | n.a. | n.a. |
| 10:2 diPAP           | n.a. | n.a. | n.a. | n.a. | n.a. | n.a. |
| PFOS-branch $\Sigma$ | 0.31 | 0.15 | 0.14 | 0.29 | 0.15 | 0.25 |

190

191 Table S12: Blanks (BW): for BW 1 and BW 2 3 mL Milli Q Water (MQ) were used, for BW 3 2 mL  
 192 bovine serum (b.s.) was used, for BW 4 bovine serum spiked with inorganic fluorine (inorg. F), and for  
 193 BW 5 2 mL bovine serum spiked with inorganic fluorine but without the additional washing step with 18  
 194 mL 0.01% ammonium solution in MQ (no add w.).

| Concentrations of the blanks 1-5 for the pooled serum samples |                |                |                  |                 |                  |
|---------------------------------------------------------------|----------------|----------------|------------------|-----------------|------------------|
| Compound                                                      | BW 1 (3 mL MQ) | BW 2 (3 mL MQ) | BW 3 (2 mL b.s.) | BW 4 (inorg. F) | BW 5 (no add w.) |
| PFBA                                                          | <LOD           | <LOD           | <LOD             | <LOD            | <LOD             |
| PFPeA                                                         | <LOD           | <LOD           | <LOD             | <LOD            | <LOD             |
| PFHxA                                                         | 0.0054         | 0.0087         | 0.0091           | 0.0096          | <LOD             |
| PFHpA                                                         | <LOD           | <LOD           | <LOD             | <LOD            | <LOD             |
| PFOA                                                          | 0.0042         | 0.0068         | 0.0086           | 0.0075          | <LOD             |
| PFNA                                                          | <LOD           | <LOD           | 0.028            | 0.025           | 0.017            |
| PFDA                                                          | <LOD           | <LOQ           | <LOQ             | <LOQ            | <LOQ             |
| PFUnDA                                                        | 0.010          | 0.013          | 0.0099           | <LOQ            | <LOD             |
| PFDoDA                                                        | 0.0017         | 0.0017         | 0.0026           | 0.0026          | 0.0026           |
| PFTTrDA                                                       | n.a.           | n.a.           | n.a.             | n.a.            | n.a.             |
| PFTDA                                                         | n.a.           | n.a.           | n.a.             | n.a.            | n.a.             |
| PFHxDA                                                        | n.a.           | n.a.           | n.a.             | n.a.            | n.a.             |
| PFOcDA                                                        | n.a.           | n.a.           | n.a.             | n.a.            | n.a.             |
| PFBS                                                          | 0.0012         | 0.0007         | <LOD             | <LOD            | <LOD             |
| PFPeS                                                         | <LOD           | <LOD           | <LOD             | <LOQ            | 0.0015           |
| PFHxS                                                         | <LOQ           | 0.0046         | 0.041            | 0.049           | 0.040            |
| PFHpS                                                         | <LOD           | <LOD           | 0.0021           | 0.0050          | 0.0073           |
| L-PFOS                                                        | <LOD           | <LOD           | 0.065            | 0.073           | 0.072            |
| PFNS                                                          | <LOD           | <LOD           | <LOD             | <LOD            | <LOD             |
| PFDS                                                          | <LOD           | <LOD           | <LOD             | <LOD            | <LOD             |
| PFDoDS                                                        | n.a.           | n.a.           | n.a.             | n.a.            | n.a.             |



|                |        |        |        |        |        |
|----------------|--------|--------|--------|--------|--------|
| PFECHS         | 0.0002 | 0.0002 | 0.0003 | 0.0003 | 0.0003 |
| FBSA           | <LOD   | <LOD   | <LOD   | <LOD   | <LOD   |
| MeFBSA         | n.a.   | n.a.   | n.a.   | n.a.   | n.a.   |
| FHxSA          | <LOD   | <LOD   | 0.0229 | <LOD   | <LOD   |
| MeFHxSA        | <LOD   | <LOD   | <LOD   | <LOD   | <LOD   |
| FOSA           | <LOD   | <LOD   | <LOD   | <LOD   | <LOD   |
| MeFOSA         | <LOD   | <LOD   | <LOD   | <LOD   | <LOD   |
| EtFOSA         | <LOD   | <LOD   | <LOD   | <LOD   | <LOD   |
| MeFOSE         | <LOD   | <LOD   | <LOD   | <LOD   | <LOD   |
| EtFOSE         | <LOD   | <LOD   | <LOD   | <LOD   | <LOD   |
| 3:3 FTCA       | <LOD   | <LOD   | <LOD   | <LOD   | <LOD   |
| 5:3 FTCA       | <LOD   | <LOD   | <LOD   | <LOD   | <LOD   |
| 7:3 FTCA       | <LOD   | <LOD   | <LOD   | <LOD   | <LOD   |
| 6:2 FTUCA      | <LOD   | <LOD   | <LOD   | <LOD   | <LOD   |
| 8:2 FTUCA      | <LOD   | <LOD   | <LOD   | <LOD   | <LOD   |
| 10:2 FTUCA     | <LOD   | <LOD   | <LOD   | <LOD   | <LOD   |
| 4:2 FTSA       | <LOD   | <LOD   | <LOD   | <LOD   | <LOD   |
| 6:2 FTSA       | n.a.   | n.a.   | n.a.   | n.a.   | n.a.   |
| 8:2 FTSA       | <LOD   | <LOD   | <LOD   | <LOD   | <LOD   |
| 10:2 FTSA      | <LOD   | <LOD   | <LOD   | <LOD   | <LOD   |
| PFHxPA         | <LOD   | <LOD   | <LOD   | <LOD   | <LOD   |
| PFOPA          | n.a.   | n.a.   | n.a.   | n.a.   | n.a.   |
| PFDPA          | n.a.   | n.a.   | n.a.   | n.a.   | n.a.   |
| 6:6 PFPiA      | <LOD   | <LOD   | <LOD   | <LOD   | <LOD   |
| 6:8 PFPiA      | n.a.   | n.a.   | n.a.   | n.a.   | n.a.   |
| 8:8 PFPiA      | n.a.   | n.a.   | n.a.   | n.a.   | n.a.   |
| 8:2 CI-PFESA   | <LOD   | <LOD   | <LOD   | <LOD   | <LOD   |
| 6:2 CI-PFESA   | <LOD   | <LOD   | <LOD   | <LOD   | <LOD   |
| ADONA          | <LOD   | <LOD   | <LOD   | <LOD   | <LOD   |
| HFPO-DA (GenX) | n.a.   | n.a.   | n.a.   | n.a.   | n.a.   |
| MeFOSAA        | <LOD   | <LOD   | <LOD   | <LOD   | <LOD   |
| EtFOSAA        | <LOD   | <LOD   | <LOD   | <LOD   | <LOD   |

|                      |      |      |       |       |       |
|----------------------|------|------|-------|-------|-------|
| diSAmPAP             | n.a. | n.a. | n.a.  | n.a.  | n.a.  |
| 6:2 monoPAP          | n.a. | n.a. | n.a.  | n.a.  | n.a.  |
| 8:2 monoPAP          | n.a. | n.a. | n.a.  | n.a.  | n.a.  |
| 10:2 monoPAP         | <LOD | <LOD | <LOD  | <LOD  | <LOD  |
| 6:2 diPAP            | <LOD | <LOD | <LOD  | <LOD  | <LOD  |
| 8:2 diPAP            | n.a. | n.a. | n.a.  | n.a.  | n.a.  |
| 6:2/8:2 diPAP        | n.a. | n.a. | n.a.  | n.a.  | n.a.  |
| 10:2 diPAP           | n.a. | n.a. | n.a.  | n.a.  | n.a.  |
| PFOS-branch $\Sigma$ | <LOD | <LOD | 0.023 | 0.020 | 0.024 |

195

196

197 Table S13: Blanks (BW): for BW 6 and BW 7 3 mL Milli Q Water (MQ) were used, for BW 8 2 mL  
198 bovine serum (b.s.) was used, for BW 9 bovine serum spiked with inorganic fluorine (inorg. F), and for  
199 BW 10 2 mL bovine serum spiked with inorganic fluorine but without the additional washing step with  
200 18 mL 0.01% ammonium solution in MQ (no add w.).

| Concentrations of the blanks 6-10 for the pooled serum samples |                |                |                  |                 |                   |
|----------------------------------------------------------------|----------------|----------------|------------------|-----------------|-------------------|
| Compound                                                       | BW 6 (3 mL MQ) | BW 7 (3 mL MQ) | BW 8 (2 mL b.s.) | BW 9 (inorg. F) | BW 10 (no add w.) |
| PFBA                                                           | <LOD           | <LOD           | <LOD             | <LOD            | 0.21              |
| PFPeA                                                          | <LOD           | <LOD           | <LOD             | <LOD            | <LOD              |
| PFHxA                                                          | 0.015          | 0.019          | 0.023            | 0.021           | <LOD              |
| PFHpA                                                          | <LOD           | <LOD           | <LOQ             | <LOD            | <LOD              |
| PFOA                                                           | 0.012          | 0.013          | 0.016            | 0.015           | <LOQ              |
| PFNA                                                           | <LOD           | <LOD           | 0.032            | 0.031           | 0.011             |
| PFDA                                                           | <LOD           | <LOD           | 0.0215           | 0.024           | <LOQ              |
| PFUnDA                                                         | 0.0052         | 0.011          | 0.017            | 0.011           | 0.013             |
| PFDoDA                                                         | 0.0017         | 0.0017         | 0.0026           | 0.0026          | 0.0026            |
| PFTTrDA                                                        | n.a.           | n.a.           | n.a.             | n.a.            | n.a.              |
| PFTDA                                                          | n.a.           | n.a.           | n.a.             | n.a.            | n.a.              |
| PFHxDA                                                         | n.a.           | n.a.           | n.a.             | n.a.            | n.a.              |
| PFOcDA                                                         | n.a.           | n.a.           | n.a.             | n.a.            | n.a.              |
| PFBS                                                           | <LOD           | <LOD           | <LOD             | <LOD            | <LOD              |

|            |        |        |        |        |        |
|------------|--------|--------|--------|--------|--------|
| PFPeS      | <LOD   | <LOD   | <LOD   | <LOD   | <LOD   |
| PFHxS      | 0.0083 | 0.012  | 0.084  | 0.062  | 0.061  |
| PFHpS      | <LOD   | <LOD   | <LOD   | 0.0038 | 0.0048 |
| L-PFOS     | <LOD   | <LOD   | 0.10   | 0.11   | 0.11   |
| PFNS       | <LOD   | <LOD   | <LOD   | <LOD   | <LOD   |
| PFDS       | <LOD   | <LOD   | <LOD   | <LOD   | <LOD   |
| PFDoDS     | n.a.   | n.a.   | n.a.   | n.a.   | n.a.   |
| PFECHS     | 0.0002 | 0.0002 | 0.0003 | 0.0003 | 0.0003 |
| FBSA       | <LOD   | <LOD   | <LOD   | <LOD   | <LOD   |
| MeFBSA     | <LOD   | <LOD   | <LOD   | <LOD   | <LOD   |
| PFHxSA     | <LOD   | <LOD   | <LOD   | 0.039  | <LOD   |
| MePFHxSA   | <LOD   | <LOD   | <LOD   | <LOD   | <LOD   |
| PFOSA      | <LOD   | <LOD   | <LOD   | <LOD   | <LOD   |
| MeFOSA     | <LOD   | <LOD   | <LOD   | <LOD   | <LOD   |
| EtFOSA     | n.a.   | n.a.   | n.a.   | n.a.   | n.a.   |
| MeFOSE     | <LOD   | <LOD   | <LOD   | <LOD   | <LOD   |
| EtFOSE     | <LOD   | <LOD   | <LOD   | <LOD   | <LOD   |
| 3:3 FTCA   | <LOD   | <LOD   | <LOD   | <LOD   | <LOD   |
| 5:3 FTCA   | <LOD   | <LOD   | <LOD   | <LOD   | <LOD   |
| 7:3 FTCA   | <LOD   | <LOD   | <LOD   | <LOD   | <LOD   |
| 6:2 FTUCA  | <LOD   | <LOD   | <LOD   | <LOD   | <LOD   |
| 8:2 FTUCA  | <LOD   | <LOD   | <LOD   | <LOD   | <LOD   |
| 10:2 FTUCA | <LOD   | <LOD   | <LOD   | <LOD   | <LOD   |
| 4:2 FTSA   | <LOD   | <LOD   | <LOD   | <LOD   | <LOD   |
| 6:2 FTSA   | 0.0058 | 0.010  | 0.63   | 0.61   | 0.59   |
| 8:2 FTSA   | <LOD   | <LOD   | <LOD   | <LOD   | <LOD   |
| 10:2 FTSA  | n.a.   | n.a.   | n.a.   | n.a.   | n.a.   |
| PFHxPA     | <LOD   | <LOD   | <LOD   | <LOD   | <LOD   |
| PFOPA      | n.a.   | n.a.   | n.a.   | n.a.   | n.a.   |
| PFDPA      | n.a.   | n.a.   | n.a.   | n.a.   | n.a.   |
| 6:6 PFPiA  | <LOD   | <LOD   | <LOD   | <LOD   | <LOD   |
| 6:8 PFPiA  | n.a.   | n.a.   | n.a.   | n.a.   | n.a.   |

|                      |        |        |        |       |       |
|----------------------|--------|--------|--------|-------|-------|
| 8:8 PFPiA            | n.a.   | n.a.   | n.a.   | n.a.  | n.a.  |
| 8:2 CI-PFESA         | <LOD   | <LOD   | <LOD   | <LOD  | <LOD  |
| 6:2 CI-PFESA         | <LOD   | <LOD   | <LOD   | <LOD  | <LOD  |
| ADONA                | <LOD   | <LOD   | 0.0030 | <LOD  | <LOD  |
| HFPO-DA (GenX)       | n.a.   | n.a.   | n.a.   | n.a.  | n.a.  |
| N-MeFOSAA            | <LOD   | <LOD   | <LOD   | <LOQ  | <LOD  |
| N-EtFOSAA            | <LOD   | <LOD   | <LOD   | <LOD  | <LOD  |
| diSAmPAP             | n.a.   | n.a.   | n.a.   | n.a.  | n.a.  |
| 6:2 monoPAP          | n.a.   | n.a.   | n.a.   | n.a.  | n.a.  |
| 8:2 monoPAP          | n.a.   | n.a.   | n.a.   | n.a.  | n.a.  |
| 10:2 monoPAP         | <LOD   | <LOD   | <LOD   | <LOD  | <LOD  |
| 6:2 diPAP            | <LOD   | <LOD   | <LOD   | <LOD  | <LOD  |
| 8:2 diPAP            | n.a.   | n.a.   | n.a.   | n.a.  | n.a.  |
| 6:2/8:2 diPAP        | n.a.   | n.a.   | n.a.   | n.a.  | n.a.  |
| 10:2 diPAP           | n.a.   | n.a.   | n.a.   | n.a.  | n.a.  |
| PFOS-branch $\Sigma$ | 0.0013 | 0.0003 | 0.026  | 0.033 | 0.047 |

201

202

203 Table S14: Blanks (BW): for BW 11 and BW 12 3 mL Milli Q Water (MQ) were used, for BW 13 2 mL

204 bovine serum (b.s.) was used, for BW 14 and BW 15 bovine serum spiked with inorganic fluorine

205 (inorg. F), and for BW 16 2 mL bovine serum spiked with inorganic fluorine but without the additional

206 washing step with 18 mL 0.01% ammonium solution in MQ (no add w.).

| Concentrations of the blanks 11-16 for the pooled serum samples |                    |                    |                      |                     |                     |                      |
|-----------------------------------------------------------------|--------------------|--------------------|----------------------|---------------------|---------------------|----------------------|
| Compound                                                        | BW 11<br>(3 mL MQ) | BW 12<br>(3 mL MQ) | BW 13<br>(2 mL b.s.) | BW 14<br>(inorg. F) | BW 15<br>(inorg. F) | BW 16<br>(no add w.) |
| PFBA                                                            | <LOD               | <LOD               | <LOD                 | <LOD                | <LOD                | 0.0571               |
| PFPeA                                                           | <LOD               | <LOD               | <LOD                 | <LOD                | <LOD                | <LOD                 |
| PFHxA                                                           | <LOD               | <LOD               | <LOD                 | <LOD                | <LOD                | <LOD                 |
| PFHpA                                                           | <LOQ               | <LOD               | <LOD                 | <LOD                | <LOD                | <LOD                 |
| PFOA                                                            | 0.013              | 0.014              | 0.021                | 0.021               | 0.042               | 0.017                |
| PFNA                                                            | <LOD               | <LOD               | 0.021                | 0.023               | 0.028               | 0.010                |
| PFDA                                                            | <LOD               | <LOD               | 0.018                | <LOQ                | 0.023               | <LOQ                 |

|            |        |        |        |        |        |        |
|------------|--------|--------|--------|--------|--------|--------|
| PFUnDA     | 0.0050 | 0.0063 | 0.0095 | 0.017  | 0.017  | 0.0091 |
| PFDoDA     | 0.0017 | 0.0017 | 0.0026 | 0.0026 | 0.0026 | <LOD   |
| PFTTrDA    | n.a.   | n.a.   | n.a.   | n.a.   | n.a.   | n.a.   |
| PFTDA      | n.a.   | n.a.   | n.a.   | n.a.   | n.a.   | n.a.   |
| PFHxDA     | n.a.   | n.a.   | n.a.   | n.a.   | n.a.   | n.a.   |
| PFOcDA     | n.a.   | n.a.   | n.a.   | n.a.   | n.a.   | n.a.   |
| PFBS       | <LOD   | <LOD   | <LOD   | <LOD   | <LOD   | <LOD   |
| PFPeS      | <LOD   | <LOD   | <LOD   | <LOD   | <LOD   | <LOD   |
| PFHxS      | 0.0065 | 0.0096 | 0.049  | 0.047  | 0.11   | 0.034  |
| PFHpS      | <LOD   | <LOD   | 0.0040 | 0.0045 | 0.0010 | 0.0013 |
| L-PFOS     | <LOD   | <LOD   | 0.066  | 0.086  | 0.070  | 0.049  |
| PFNS       | <LOD   | <LOD   | <LOD   | <LOD   | <LOD   | <LOD   |
| PFDS       | <LOD   | <LOD   | <LOD   | <LOD   | <LOD   | <LOD   |
| PFDoDS     | n.a.   | n.a.   | n.a.   | n.a.   | n.a.   | n.a.   |
| PFECHS     | 0.0002 | 0.0002 | 0.0003 | 0.0003 | 0.0003 | 0.0035 |
| FBSA       | <LOD   | <LOD   | <LOD   | <LOD   | <LOD   | <LOD   |
| MeFBSA     | <LOD   | <LOD   | <LOD   | <LOD   | <LOD   | <LOD   |
| FHxSA      | <LOD   | <LOD   | <LOD   | <LOD   | <LOD   | <LOD   |
| MeFHxSA    | <LOD   | <LOD   | <LOD   | <LOD   | <LOD   | <LOD   |
| FOSA       | <LOD   | <LOD   | <LOD   | <LOD   | <LOD   | <LOD   |
| MeFOSA     | <LOD   | <LOD   | <LOD   | <LOD   | <LOD   | <LOD   |
| EtFOSA     | n.a.   | n.a.   | n.a.   | n.a.   | n.a.   | n.a.   |
| MeFOSE     | <LOD   | <LOD   | <LOD   | <LOD   | <LOD   | <LOD   |
| EtFOSE     | <LOD   | <LOD   | <LOD   | <LOD   | <LOD   | <LOD   |
| 3:3 FTCA   | <LOD   | <LOD   | <LOD   | <LOD   | <LOD   | <LOD   |
| 5:3 FTCA   | <LOD   | <LOD   | <LOD   | <LOD   | <LOD   | <LOD   |
| 7:3 FTCA   | <LOD   | <LOD   | <LOD   | <LOD   | <LOD   | <LOD   |
| 6:2 FTUCA  | <LOD   | <LOD   | <LOD   | <LOD   | <LOD   | <LOD   |
| 8:2 FTUCA  | <LOD   | <LOD   | <LOD   | <LOD   | <LOD   | <LOD   |
| 10:2 FTUCA | <LOD   | <LOD   | <LOD   | <LOD   | <LOD   | <LOD   |
| 4:2 FTSA   | <LOD   | <LOD   | <LOD   | <LOD   | <LOD   | <LOD   |
| 6:2 FTSA   | 0.0045 | 0.0045 | 0.40   | 0.39   | 0.46   | 0.36   |

|                      |        |        |       |       |       |       |
|----------------------|--------|--------|-------|-------|-------|-------|
| 8:2 FTSA             | <LOD   | <LOD   | <LOD  | <LOD  | <LOD  | <LOD  |
| 10:2 FTSA            | n.a.   | n.a.   | n.a.  | n.a.  | n.a.  | n.a.  |
| PFHxPA               | <LOD   | <LOD   | <LOD  | <LOD  | <LOD  | <LOD  |
| PFOPA                | n.a.   | n.a.   | n.a.  | n.a.  | n.a.  | n.a.  |
| PFDPA                | n.a.   | n.a.   | n.a.  | n.a.  | n.a.  | n.a.  |
| 6:6 PFPiA            | <LOD   | <LOD   | <LOD  | <LOD  | <LOD  | <LOD  |
| 6:8 PFPiA            | n.a.   | n.a.   | n.a.  | n.a.  | n.a.  | n.a.  |
| 8:8 PFPiA            | n.a.   | n.a.   | n.a.  | n.a.  | n.a.  | n.a.  |
| 8:2 Cl-PFESA         | <LOD   | <LOD   | <LOD  | <LOD  | <LOD  | <LOD  |
| 6:2 Cl-PFESA         | <LOD   | <LOD   | <LOD  | <LOD  | <LOD  | <LOD  |
| ADONA                | <LOD   | 0.0015 | <LOD  | <LOD  | <LOD  | <LOD  |
| HFPO-DA (GenX)       | n.a.   | n.a.   | n.a.  | n.a.  | n.a.  | n.a.  |
| MeFOSAA              | <LOD   | <LOD   | <LOD  | <LOD  | <LOD  | <LOD  |
| EtFOSAA              | <LOD   | <LOD   | <LOD  | <LOD  | <LOD  | <LOD  |
| diSAmpPAP            | n.a.   | n.a.   | n.a.  | n.a.  | n.a.  | n.a.  |
| 6:2 monoPAP          | n.a.   | n.a.   | n.a.  | n.a.  | n.a.  | n.a.  |
| 8:2 monoPAP          | n.a.   | n.a.   | n.a.  | n.a.  | n.a.  | n.a.  |
| 10:2 monoPAP         | n.n.   | n.n.   | n.n.  | n.n.  | n.n.  | n.n.  |
| 6:2 diPAP            | n.n.   | n.n.   | n.n.  | n.n.  | n.n.  | n.n.  |
| 8:2 diPAP            | n.a.   | n.a.   | n.a.  | n.a.  | n.a.  | n.a.  |
| 6:2/8:2 diPAP        | n.a.   | n.a.   | n.a.  | n.a.  | n.a.  | n.a.  |
| 10:2 diPAP           | n.a.   | n.a.   | n.a.  | n.a.  | n.a.  | n.a.  |
| PFOS-branch $\Sigma$ | 0.0000 | 0.0028 | 0.030 | 0.024 | 0.015 | 0.013 |

207

208

209 Table S15: Blanks (BW): for BW 1 and BW 3 3 mL Milli Q Water (MQ) were used spiked with inorganic  
210 fluorine (inorg. F), and for BW 2 and BW 4 3 mL MQ were used without the addition of inorganic  
211 fluorine.

| Concentrations of the blanks 1-4 for the pooled placental tissue samples |                             |                       |                             |                       |
|--------------------------------------------------------------------------|-----------------------------|-----------------------|-----------------------------|-----------------------|
| Compound                                                                 | BW 1<br>(3 mL MQ, inorg. F) | BW 2<br>(no inorg. F) | BW 3<br>(3 mL MQ, inorg. F) | BW 4<br>(no inorg. F) |
| PFBA                                                                     | <LOQ                        | <LOQ                  | <LOD                        | <LOD                  |

|          |        |        |        |        |
|----------|--------|--------|--------|--------|
| PFPeA    | <LOD   | <LOD   | <LOD   | <LOD   |
| PFHxA    | 0.012  | 0.011  | 0.014  | 0.0077 |
| PFHpA    | <LOQ   | <LOD   | <LOD   | <LOD   |
| PFOA     | 0.011  | 0.010  | 0.016  | 0.016  |
| PFNA     | 0.0026 | 0.0020 | 0.0043 | 0.0057 |
| PFDA     | <LOD   | <LOQ   | <LOQ   | <LOQ   |
| PFUnDA   | 0.016  | 0.015  | 0.015  | 0.020  |
| PFDoDA   | <LOD   | <LOD   | <LOD   | <LOD   |
| PFTTrDA  | <LOD   | <LOD   | <LOD   | <LOD   |
| PFTDA    | <LOD   | <LOD   | <LOD   | <LOD   |
| PFHxDA   | n.a.   | n.a.   | n.a.   | n.a.   |
| PFOcDA   | n.a.   | n.a.   | n.a.   | n.a.   |
| PFBS     | <LOD   | <LOD   | <LOD   | <LOD   |
| PFPeS    | <LOD   | <LOD   | <LOD   | <LOD   |
| PFHxS    | 0.0083 | 0.0076 | 0.012  | 0.016  |
| PFHpS    | <LOD   | <LOD   | <LOD   | <LOD   |
| L-PFOS   | <LOD   | <LOD   | <LOD   | <LOD   |
| PFNS     | n.a.   | n.a.   | n.a.   | n.a.   |
| PFDS     | <LOD   | <LOD   | <LOD   | <LOD   |
| PFDoDS   | <LOD   | <LOD   | <LOD   | <LOD   |
| PFECHS   | n.a.   | n.a.   | n.a.   | n.a.   |
| FBSA     | <LOD   | <LOD   | <LOD   | <LOD   |
| MeFBSA   | <LOD   | <LOD   | <LOD   | <LOD   |
| FHxSA    | <LOD   | <LOD   | <LOD   | <LOD   |
| MeFHxSA  | <LOD   | <LOD   | <LOD   | <LOD   |
| FOSA     | n.a.   | n.a.   | n.a.   | n.a.   |
| MeFOSA   | n.a.   | n.a.   | n.a.   | n.a.   |
| EtFOSA   | n.a.   | n.a.   | n.a.   | n.a.   |
| MeFOSE   | n.a.   | n.a.   | n.a.   | n.a.   |
| EtFOSE   | n.a.   | n.a.   | n.a.   | n.a.   |
| 3:3 FTCA | <LOD   | <LOD   | <LOD   | <LOD   |
| 5:3 FTCA | <LOD   | <LOD   | <LOD   | <LOD   |

|                      |       |       |       |       |
|----------------------|-------|-------|-------|-------|
| 7:3 FTCA             | <LOD  | <LOD  | <LOD  | <LOD  |
| 6:2 FTUCA            | <LOD  | <LOD  | <LOD  | <LOD  |
| 8:2 FTUCA            | n.a.  | n.a.  | n.a.  | n.a.  |
| 10:2 FTUCA           | n.a.  | n.a.  | n.a.  | n.a.  |
| 4:2 FTSA             | <LOD  | <LOD  | <LOD  | <LOD  |
| 6:2 FTSA             | <LOD  | <LOD  | <LOD  | <LOD  |
| 8:2 FTSA             | <LOD  | <LOD  | <LOD  | <LOD  |
| 10:2 FTSA            | n.a.  | n.a.  | n.a.  | n.a.  |
| PFHxPA               | <LOD  | <LOD  | <LOD  | <LOD  |
| PFOPA                | n.a.  | n.a.  | n.a.  | n.a.  |
| PFDPA                | n.a.  | n.a.  | n.a.  | n.a.  |
| 6:6 PFPIA            | <LOD  | <LOD  | <LOD  | <LOD  |
| 6:8 PFPIA            | n.a.  | n.a.  | n.a.  | n.a.  |
| 8:8 PFPIA            | n.a.  | n.a.  | n.a.  | n.a.  |
| 8:2 CI-PFESA         | <LOD  | <LOD  | <LOD  | <LOD  |
| 6:2 CI-PFESA         | n.a.  | n.a.  | n.a.  | n.a.  |
| ADONA                | 0.017 | 0.046 | 0.017 | 0.046 |
| HFPO-DA (GenX)       | n.a.  | n.a.  | n.a.  | n.a.  |
| MeFOSAA              | <LOD  | <LOD  | <LOD  | <LOD  |
| EtFOSAA              | <LOD  | <LOD  | <LOD  | <LOD  |
| diSAmPAP             | <LOD  | <LOD  | <LOD  | <LOD  |
| 6:2 monoPAP          | n.a.  | n.a.  | n.a.  | n.a.  |
| 8:2 monoPAP          | n.a.  | n.a.  | n.a.  | n.a.  |
| 10:2 monoPAP         | n.a.  | n.a.  | n.a.  | n.a.  |
| 6:2 diPAP            | <LOD  | <LOD  | <LOD  | <LOD  |
| 8:2 diPAP            | <LOD  | <LOD  | <LOD  | <LOD  |
| 6:2/8:2 diPAP        | <LOD  | <LOD  | <LOD  | <LOD  |
| 10:2 diPAP           | n.a.  | n.a.  | n.a.  | n.a.  |
| PFOS-branch $\Sigma$ | <LOD  | <LOD  | <LOD  | <LOD  |



213 **Extractable organofluorine (EOF) concentrations of the samples**

214 The extractable organofluorine concentrations for all sample pools are provided in  
 215 Table S16 to Table S18. Table S19 provides detailed information on the sampel  
 216 pooling and Table S20 shows extractable organofluorine concentrations from other  
 217 studies compared to the present one.

218

219 Maternal serum (matS).

220 Table S16: Identified EOF in ng F/mL in maternal serum (matS). The LOQ was 2.7 ng F/mL except for  
 221 the samples matS-B, matS-C, matS-E to matS-O, and matS-U, where the background noise  
 222 inbetween the samples was higher and therefore no values of the CIC for those samples are available.

| Sample name | CIC-EOF [ng F/mL] | Targeted [ng F/mL] | Identified [%] |
|-------------|-------------------|--------------------|----------------|
| matS-A      | 2.85              | 3.11               | 109.07         |
| matS-B      | <LOQ              | 2.74               |                |
| matS-C      | <LOQ              | 3.16               |                |
| matS-D      | 2.90              | 2.53               | 87.12          |
| matS-E      | <LOQ              | 5.87               |                |
| matS-F      | <LOQ              | 1.78               |                |
| matS-G      | <LOQ              | 2.19               |                |
| matS-H      | <LOQ              | 3.10               |                |
| matS-I      | <LOQ              | 4.70               |                |
| matS-J      | <LOQ              | 6.24               |                |
| matS-K      | <LOQ              | 3.21               |                |
| matS-L      | <LOQ              | 2.50               |                |
| matS-M      | <LOQ              | 3.34               |                |
| matS-N      | <LOQ              | 2.71               |                |
| matS-O      | <LOQ              | 6.88               |                |
| matS-P      | 3.59              | 2.33               | 64.97          |
| matS-Q      | <LOQ              | 2.08               |                |
| matS-R      | 7.17              | 2.77               | 38.68          |
| matS-S      | 2.99              | 2.08               | 69.50          |

|        |      |      |       |
|--------|------|------|-------|
| matS-T | 3.46 | 3.10 | 89.46 |
| matS-U | <LOQ | 3.47 |       |

223

224 Placental tissue (plaT).

225 Table S17: Identified EOF in ng F/mL in placental tissue (plaT). The LOQ was 0.92 ng F/mL, except

226 for plaT-I and plaT-J where the background noise inbetween the samples was higher and therefore no

227 values of the CIC for those samples are available.

| Sample name | CIC-EOF [ng F/g] | Targeted [ng F/g] | Identified [%] |
|-------------|------------------|-------------------|----------------|
| plaT-A      | 1.43             | 0.57              | 39.43          |
| plaT-B      | 1.08             | 0.53              | 49.13          |
| plaT-C      | 1.07             | 0.53              | 49.40          |
| plaT-D      | 1.85             | 0.77              | 41.49          |
| plaT-E      | <LOQ             | 0.88              |                |
| plaT-F      | <LOQ             | 0.34              |                |
| plaT-G      | <LOQ             | 0.78              |                |
| plaT-H      | 1.02             | 0.58              | 57.32          |
| plaT-I      | <LOQ             | 0.92              |                |
| plaT-J      | <LOQ             | 1.36              |                |
| plaT-K      | 1.08             | 0.62              | 57.64          |
| plaT-L      | <LOQ             | 0.45              |                |
| plaT-M      | <LOQ             | 0.74              |                |

228

229 Cord serum (cordS).

230 Table S18: Identified EOF in ng F/mL in cord serum (cordS). The LOQ was 1.1 ng F/mL, except for

231 cord-B and cord-S where the background noise inbetween the samples was higher and therefore no

232 values of the CIC for those samples are available.

| Sample name | EOF-CIC [ng F/mL] | Targeted [ng F/mL] | Identified [%] |
|-------------|-------------------|--------------------|----------------|
| cordS-B     | <LOQ              | 1.77               |                |
| cordS-C     | 1.80              | 1.20               | 66.65          |
| cordS-D     | 1.20              | 1.18               | 97.90          |
| cordS-E     | <LOQ              | 0.33               |                |

|         |      |      |        |
|---------|------|------|--------|
| cordS-H | 1.36 | 1.27 | 93.53  |
| cordS-K | 2.10 | 2.23 | 106.28 |
| cordS-L | <LOQ | 1.06 |        |
| cordS-N | 1.20 | 1.23 | 101.99 |
| cordS-O | 2.03 | 2.11 | 104.12 |
| cordS-S | <LOQ | 1.26 |        |
| cordS-U | 1.80 | 1.24 | 69.04  |

233

234

235 Table S19: Detail information on the sample pooling – sample pools for which the EOF concentration was <LOQ are marked with a “\*” and “n.a.”

236 was used if a sample pool was not available (e.g. not enough sample volume available for pooling)

| Sample | Quantity of samples for pooling (sera; placenta) | matS [ $\mu$ L] | plaT [g] | cordS [ $\mu$ L] | Gender (child) | City             | Weight [g]  | Classification | Health |
|--------|--------------------------------------------------|-----------------|----------|------------------|----------------|------------------|-------------|----------------|--------|
| A      | 3 x 600 $\mu$ L; 3 x 1.5 g                       | 1800            | 4.5      | n.a.             | female         | St. Pölten (STP) | $\leq$ 2850 | SGA            | ok     |
| B      | 2 x 600 $\mu$ L (2); 2 x 3 g                     | 1200            | 6        | 1200             | female         | Tulln (TU)       | >2850       | AGA            | ok     |
| C      | 3 x 600 $\mu$ L (2); 3 x 2g                      | 1800            | 6        | 1800             | female         | Tulln            | >2850       | AGA            | ok     |
| D      | 3 x 600 $\mu$ L (2); 3 x 1.5 g                   | 1800            | 4.5      | 1800             | female         | Tulln            | >2850       | AGA            | ok     |
| E      | 1 x 600 $\mu$ L (2); 1 x 6 g                     | 600             | 6*       | 600*             | female         | St. Pölten       | >2850       | AGA            | ok     |
| F      | 4 x 600 $\mu$ L; 4 x 1.5 g                       | 2400            | 6        | n.a.             | female         | Tulln            | >2850       | AGA            | ok     |
| G      | 2 x 600 $\mu$ L; 2 x 3 g                         | 1200            | 6        | n.a.             | male           | St. Pölten       | >2850       | AGA            | PE     |
| H      | 3 x 600 $\mu$ L (2); 3 x 1.5 g                   | 1800            | 4.5      | 1800             | male           | St Pölten        | $\leq$ 2850 | SGA            | ok     |
| I      | 1 x 600 $\mu$ L; 1 x 4.5 g                       | 600             | 4.5*     | n.a.             | male           | St. Pölten       | $\leq$ 2850 | AGA            | ok     |
| J      | 2 x 600 $\mu$ L; 2 x 2.25 g                      | 1200            | 4.5      | n.a.             | male           | Tulln            | >2850       | AGA            | ok     |
| K      | 3 x 600 $\mu$ L (2); 3 x 1.5 g                   | 1800            | 4.5      | 1800             | male           | Tulln            | >2850       | AGA            | ok     |
| L      | 3 x 600 $\mu$ L (2); 3 x 1.5 g                   | 1800            | 4.5*     | 1200*            | male           | Tulln            | >2850       | AGA            | ok     |
| M      | 2 x 600 $\mu$ L; 2 x 1.5 g                       | 1200            | 3        | n.a.             | male           | Tulln            | >2850       | AGA            | ok     |
| N      | 3 x 600 $\mu$ L (2)                              | 1800            | n.a.     | 1800             | female         | Tulln            | >2850       | AGA            | GDM    |
| O      | 2 x 600 $\mu$ L (2)                              | 1200            | n.a.     | 1200             | female         | Tulln            | mix         | AGA            | FG     |
| P      | 3 x 600 $\mu$ L                                  | 1800            | n.a.     | n.a.             | female         | Wien / STP       | mix         | AGA            | FG     |
| Q      | 3 x 600 $\mu$ L                                  | 1800            | n.a.     | n.a.             | female         | Wien             | >2850       | AGA            | ok     |
| R      | 3 x 600 $\mu$ L                                  | 1800            | n.a.     | n.a.             | female         | Wien             | >2850       | AGA            | ok     |
| S      | 3 x 600 $\mu$ L (2)                              | 1800            | n.a.     | 1800*            | male           | Tulln            | >2850       | AGA            | GDM    |

|   |                |      |      |      |      |                 |       |     |    |
|---|----------------|------|------|------|------|-----------------|-------|-----|----|
| T | 3 x 600 µL     | 1800 | n.a. | n.a. | male | Wien / STP / TU | mix   | AGA | FG |
| U | 2 x 600 µL (2) | 1200 | n.a. | 1200 | male | Wien / TU       | >2850 | LGA | ok |

237

238

239 Table S20: The comparison of EOF concentrations in ng F/mL of the present study with previous studies

| Study                                | Year of sampling | Country | matS (or others) [ng F/mL]                 | plaT [ng F/g] | cordS [ng F/mL] |
|--------------------------------------|------------------|---------|--------------------------------------------|---------------|-----------------|
| Present study                        | 2019-2020        | Austria | 2.85 – 7.17                                | 1.02 – 1.85   | 1.2 – 2.10      |
| Yeung and Mabury (2016) <sup>1</sup> | 2004             | China   | 8.22 – 94.4 (whole blood, male and female) |               |                 |
| Yeung and Mabury (2016) <sup>1</sup> | 1982-2009        | Germany | 9.42 – 42.5 (plasma, male and female)      |               |                 |
| Miaz et al. (2020) <sup>2</sup>      | 1996-2017        | Sweden  | 8.1 – 32.0 ng F/ g (serum, females)        |               |                 |
| Yeung et al. (2008) <sup>3</sup>     | 2004             | China   | < 6 – 43.4 (whole blood, male and female)  |               |                 |
| Miyake et al., (2007) <sup>4</sup>   | 2003-2004        | Japan   | < 6 – 8.9 (whole blood and serum, males)   |               |                 |
| Miyake et al., (2007) <sup>4</sup>   | 2001             | USA     | 17.8 – 59 (plasma, males)                  |               |                 |

240

241

242 **Correlation analyses and scatter plots**

243 Figures S2 to S7 show the scatter plots for the total EOF levels (EOF-CIC)  
244 determined on the CIC and individual target compound levels for matS and plaT  
245 converted to their fluorine equivalents. Additionally, scatter plots are shown for  
246 unidentified EOF levels (EOF-unid) and individual target compounds. For the scatter  
247 plots, the results from the concentrated samples were used, however, the outcome  
248 after adjusting to the original sample pool volumes is equal. The figures also show  
249 the Spearman correlation coefficients ( $r_s$ ) and the p-values. The grey zone  
250 represents the 95% confidence interval.

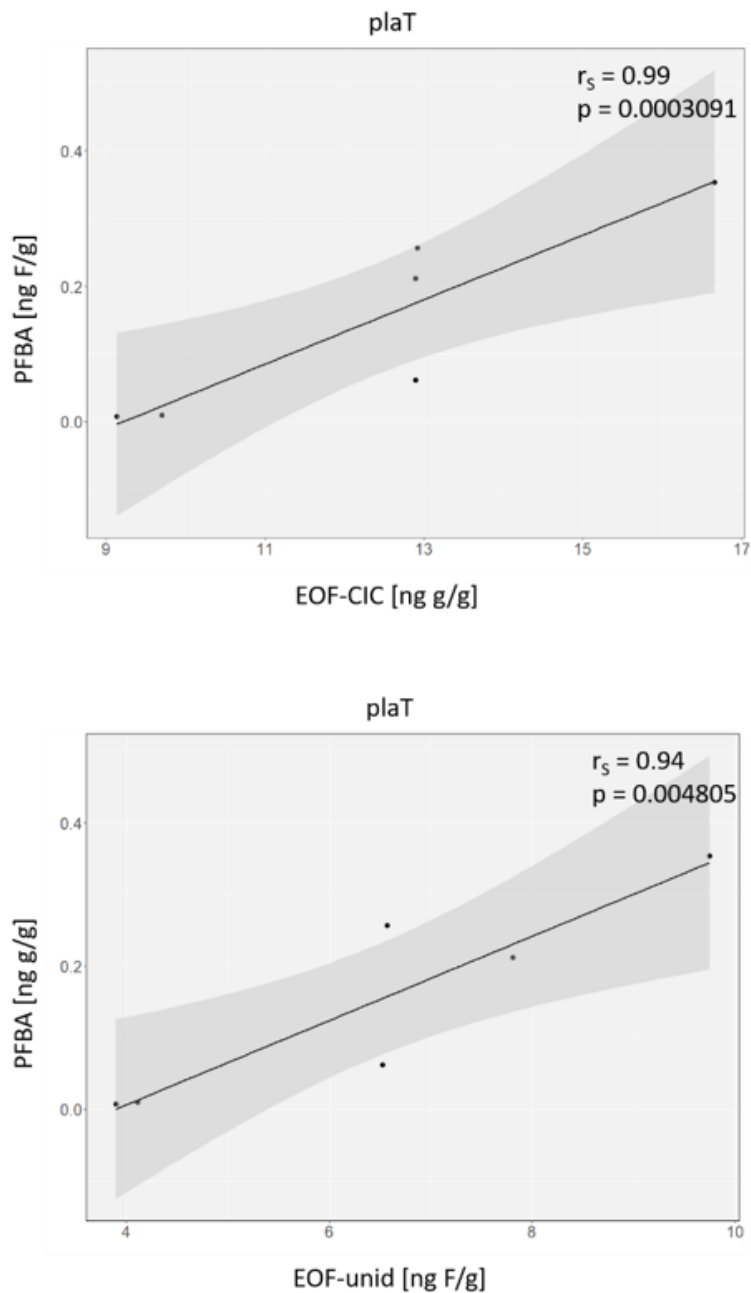

251

252 Figure S2: Correlation between PFBA and EOF-CIC, and between PFBA and EOF-unid in plaT.

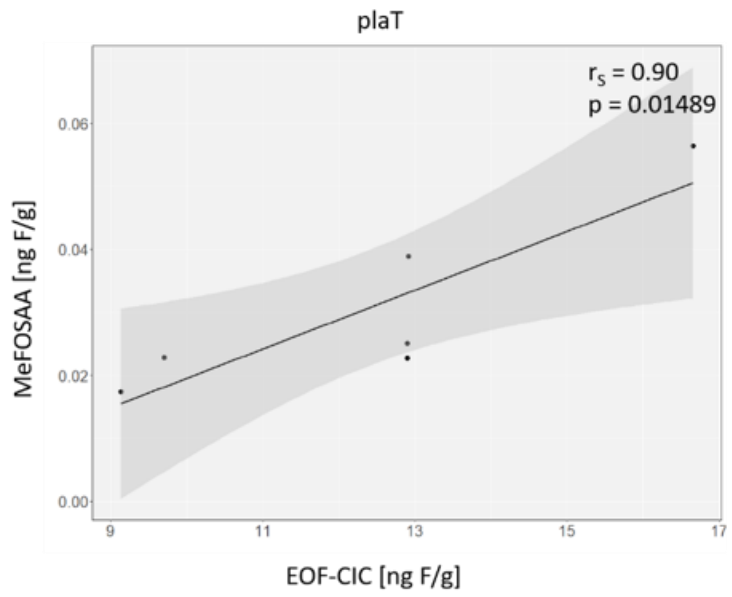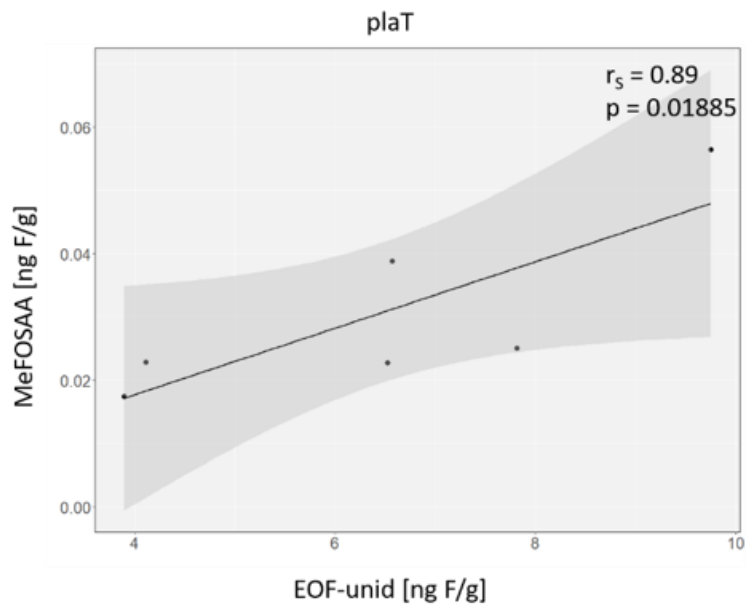

253

254 Figure S3: Correlation between MeFOSAA and EOF-CIC, and between MeFOSAA and EOF-unid in

255 plaT.

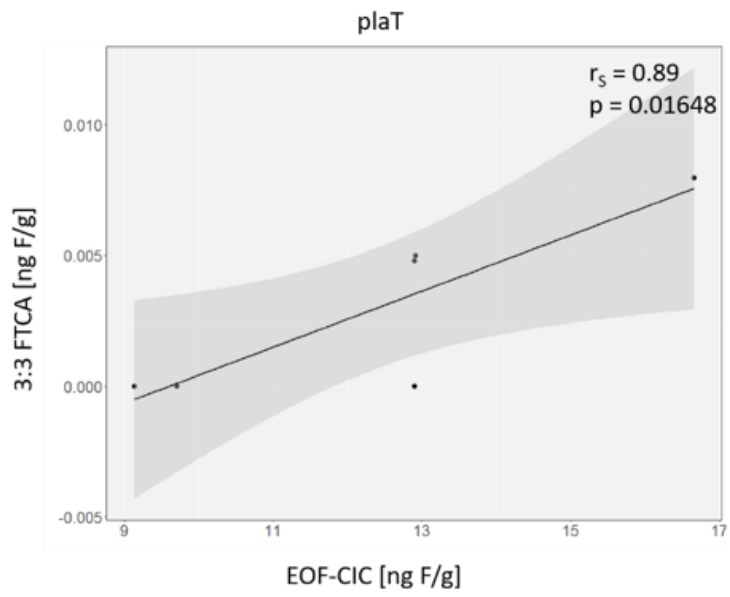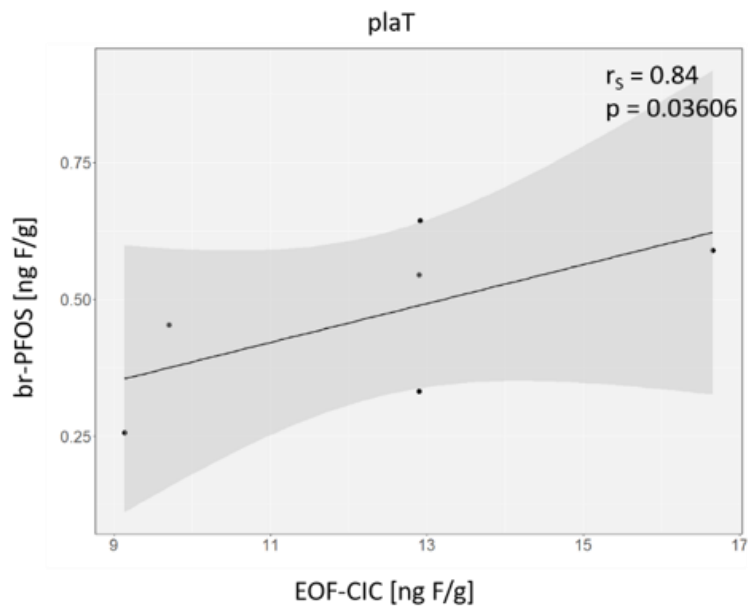

256

257 Figure S4: Correlation between 3:3 FTCA and EOF-CIC, and between br-PFOS and EOF-CIC in plaT.



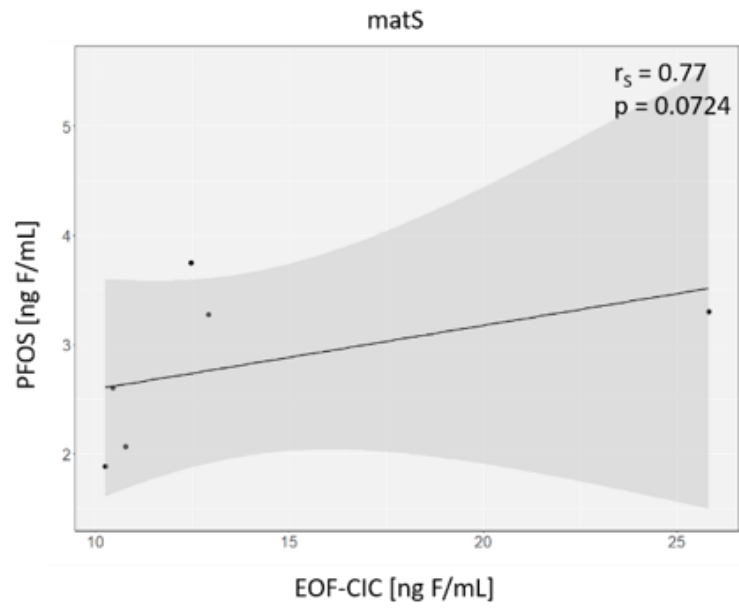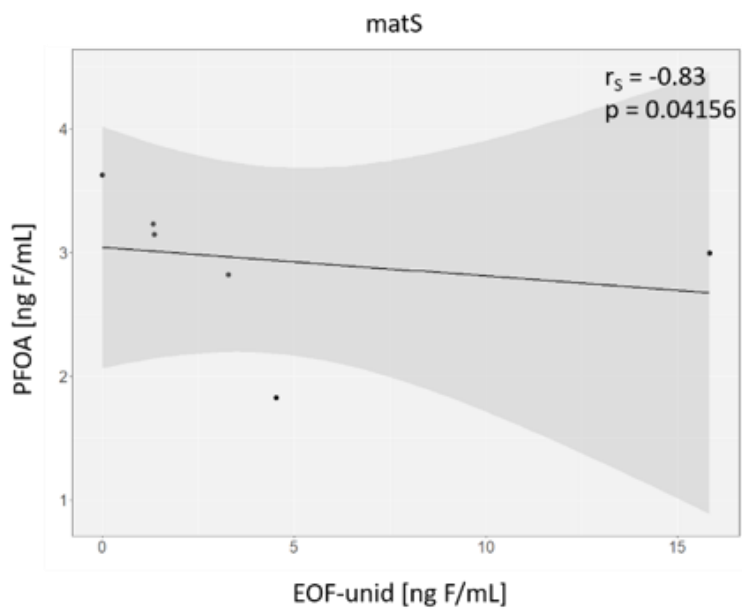

258

259

Figure S5: Correlation between PFOS and EOF-CIC, and between PFOA and EOF-unid in matS.

260

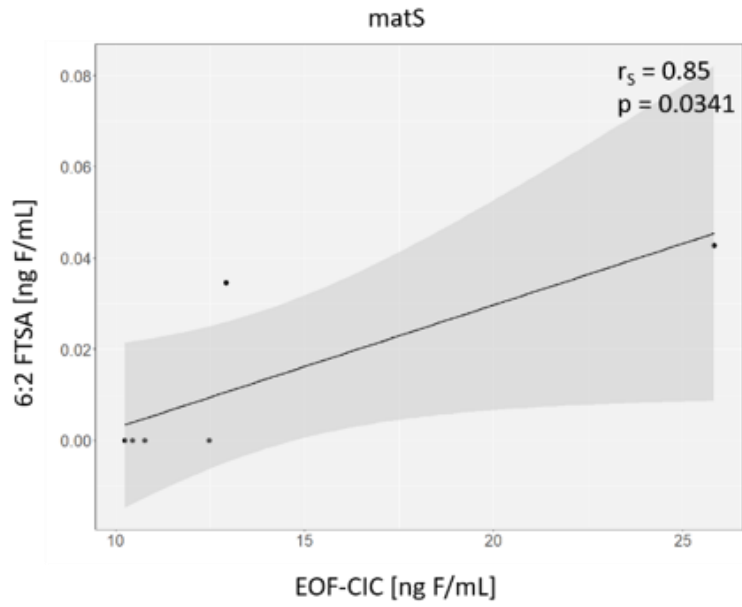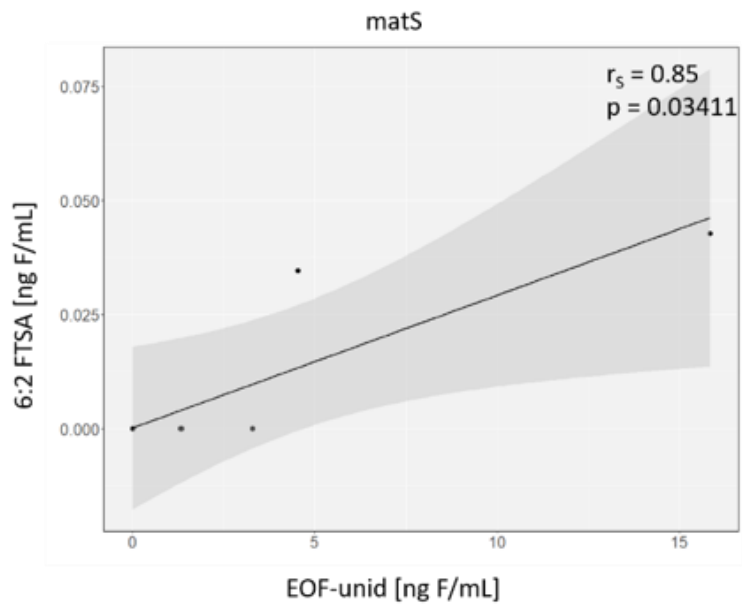

261

262 Figure S6: Correlation between 6:2 FTSA and EOF-CIC, and between 6:2 FTSA and EOF-unid in

263 matS.

264

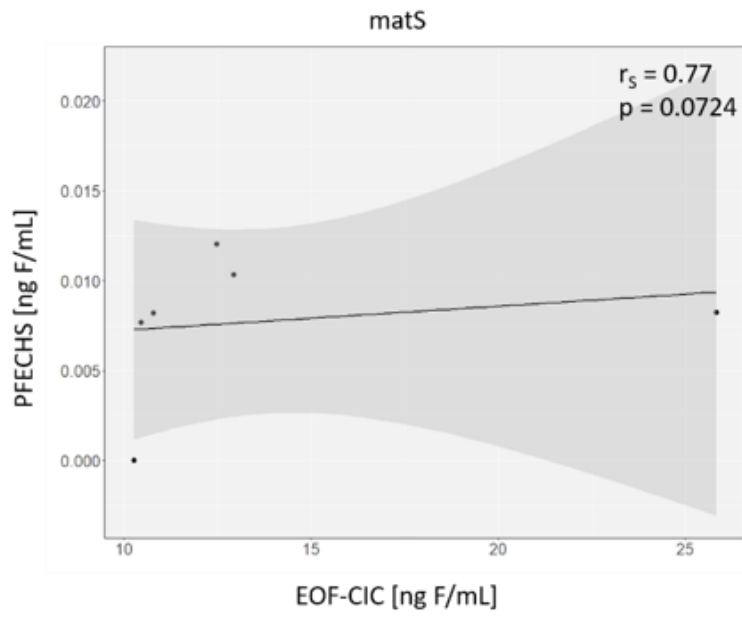

265

266

Figure S7: Correlation between PFECHS and EOF-CIC in matS.

267

268 **Abbreviations**

269

|     |              |                                                               |
|-----|--------------|---------------------------------------------------------------|
| 270 | 6:2 CI-PFESA | 6:2 chlorinated polyfluorinated ether sulfonate (major F-53B) |
| 271 | 6:6 PFPiA    | bis(perfluorohexyl)phosphinate (bis(perfluorohexyl)phosphinic |
| 272 |              | acid)                                                         |
| 273 | 6:8 PFPiA    | perfluorohexyl-perfluorooctyl phosphinate (perfluorohexyl-    |
| 274 |              | perfluorooctyl phosphinic acid)                               |
| 275 | 8:2 CI-PFESA | 8:2 chlorinated polyfluorinated ether sulfonate (minor F-53B) |
| 276 | 8:2 monoPAP  | 8:2 polyfluoroalkyl phosphate monoester                       |
| 277 | 8:8 PFPiA    | bis(perfluorooctyl)phosphinate (bis(perfluorooctyl)phosphinic |
| 278 |              | acid)                                                         |
| 279 | ADONA        | dodecafluoro-3H-4,8-dioxanonanoate                            |
| 280 | CIC          | combustion ion chromatography                                 |
| 281 | diPAPs       | polyfluoroalkyl phosphate diesters                            |
| 282 | diSAmPAP     | (bis-)2-N-ethylperfluorooctane-n-sulfonamido-ethyl-phosphate  |
| 283 | EOF          | extractable organofluorine                                    |
| 284 | ESI          | electrospray ionization                                       |
| 285 | EtFOSA       | N-ethyl-perfluoro-n-octane sulfonamide                        |
| 286 | EtFOSAA      | N-ethyl-perfluoro-n-octane sulfonamido acetic acid            |
| 287 | EtFOSE       | N-ethyl-perfluoro-n-octane sulfonamido ethanol                |
| 288 | FBSA         | perfluoro-n-butane sulfonamide                                |
| 289 | FHxSA        | perfluoro-n-hexane sulfonamide                                |
| 290 | FOSA         | perfluoro-n-octane sulfonamide                                |
| 291 | FOSAs        | perfluoroalkyl sulfonamides                                   |
| 292 | FOSEs        | perfluoroalkyl sulfonamidoethanols                            |
| 293 | FTCAs        | fluorotelomer carboxylate (fluorotelomer carboxylic acids)    |

|     |            |                                                                 |
|-----|------------|-----------------------------------------------------------------|
| 294 | FTOHs      | fluorotelomer alcohols                                          |
| 295 | FTSAs      | fluorotelomer sulfonate (fluorotelomer sulfonic acids)          |
| 296 | FTUCAs     | fluorotelomer unsaturated carboxylates (fluorotelomer           |
| 297 |            | unsaturated carboxylic acids)                                   |
| 298 | fTW        | filtered-tap-water                                              |
| 299 | HF         | hydrogen fluoride                                               |
| 300 | HFPO-DA    | hexafluoropropylene oxide dimer acid (GenX)                     |
| 301 | HPLC-MS/MS | high-performance liquid chromatography tandem-mass              |
| 302 |            | spectrometry                                                    |
| 303 | MeFBSA     | N-methyl-perfluorobutane sulfonamide                            |
| 304 | MeFHxSA    | N-methyl-perfluoro-n-hexane sulfonamide                         |
| 305 | MeFOSA     | N-methyl-perfluoro-n-octane sulfonamide                         |
| 306 | MeFOSAA    | N-methyl-perfluoro-n-octane sulfonamido acetic acid             |
| 307 | MeFOSE     | N-methyl-perfluoro-n-octane sulfonamido ethanol                 |
| 308 | monoPAPs   | polyfluoroalkyl phosphate monoesters                            |
| 309 | OBS        | p-perfluorous noneoxybenzenesulfonate                           |
| 310 | PAPs       | polyfluoroalkyl phosphate esters                                |
| 311 | PASF       | perfluoroalkyl sulfonyl fluoride                                |
| 312 | PFAAs      | perfluoroalkyl acids                                            |
| 313 | PFBA       | perfluoro-n-butane carboxylate (perfluoro-n-butanoic acid)      |
| 314 | PFBS       | perfluoro-n-butane sulfonate (perfluoro-n-butane sulfonic acid) |
| 315 | PFCAs      | perfluoroalkyl carboxylates (perfluoroalkyl carboxylic acids)   |
| 316 | PFDA       | perfluoro-n-decane carboxylate (perfluoro-n-decanoic acid)      |
| 317 | PFDODA     | perfluoro-n-dodecane carboxylate (perfluoro-n-dodecanoic acid)  |
| 318 | PFDODS     | perfluoro-n-dodecane sulfonate (perfluoro-n-dodecane sulfonic   |
| 319 |            | acid)                                                           |

|     |        |                                                                    |
|-----|--------|--------------------------------------------------------------------|
| 320 | PFDDPA | perfluorodecyl phosphonate (perfluorodecyl phosphonic acid)        |
| 321 | PFDS   | perfluoro-n-decane sulfonate (perfluoro-n-decane sulfonic acid)    |
| 322 | PFECAs | perfluoroalkyl ether carboxylates (perfluoroalkyl ether carboxylic |
| 323 |        | acids)                                                             |
| 324 | PFECHS | perfluoro-4-ethylcyclohexane sulfonate                             |
| 325 | PFESAs | perfluoroalkyl ether sulfonates (perfluoroalkyl ether sulfonic     |
| 326 |        | acids)                                                             |
| 327 | PFHpA  | perfluoro-n-heptane carboxylate (perfluoro-n-heptanoic acid)       |
| 328 | PFHpS  | perfluoro-n-heptane sulfonate (perfluoro-n-heptane sulfonic acid)  |
| 329 | PFHxA  | perfluoro-n-hexane carboxylate (perfluoro-n-hexanoic acid)         |
| 330 | PFHxDA | perfluoro-n-hexadecane carboxylate (perfluoro-n-hexadecanoic       |
| 331 |        | acid)                                                              |
| 332 | PFHxPA | perfluorohexyl phosphonate (perfluorohexyl phosphonic acid)        |
| 333 | PFHxS  | perfluoro-n-hexane sulfonate (perfluoro-n-hexane sulfonic acid)    |
| 334 | PFNA   | perfluoro-n-nonane carboxylate (perfluoro-n-nonanoic acid)         |
| 335 | PFNS   | perfluoro-n-nonane sulfonate (perfluoro-n-nonane sulfonic acid)    |
| 336 | PFOA   | perfluoro-n-octane carboxylate (perfluoro-n-octanoic acid)         |
| 337 | PFOcDA | perfluoro-n-octadecane carboxylate (perfluoro-n-octadecanoic       |
| 338 |        | acid)                                                              |
| 339 | PFOPA  | perfluorooctyl phosphonate (perfluorooctyl phosphonic acid)        |
| 340 | PFOS   | perfluoro-n-octane sulfonate (perfluoro-n-octane sulfonic acid)    |
| 341 | PFPA   | perfluoroalkyl phosphonate (perfluoroalkyl phosphonic acids)       |
| 342 | PFPeA  | perfluoro-n-pentane carboxylate (perfluoro-n-pentanoic acid)       |
| 343 | PFPeS  | perfluoro-n-pentane sulfonate (perfluoro-n-pentane sulfonic acid)  |
| 344 | PFPIAs | perfluoroalkyl phosphinates (perfluoroalkyl phosphinic acids)      |
| 345 | PFSA   | perfluoroalkyl sulfonates (perfluoroalkane sulfonic acids)         |

|     |         |                                                                  |
|-----|---------|------------------------------------------------------------------|
| 346 | PFTeDA  | perfluoro-n-tetradecane carboxylate (perfluoro-n-tetradecanoic   |
| 347 |         | acid)                                                            |
| 348 | PFTrDA  | perfluoro-n-tridecane carboxylate (perfluoro-n-tridecanoic acid) |
| 349 | PFUnDA  | perfluoro-n-undecane carboxylate (perfluoro-n-undecanoic acid)   |
| 350 | POPs    | persistent organic pollutants                                    |
| 351 | SPE-HLB | solid phase extraction with hydrophilic lipophilic balance       |
| 352 | SPE-WAX | solid phase extraction with weak anion exchange                  |
| 353 | TTEs    | transplacental transfer efficiencies                             |
| 354 | UPLC    | ultra-performance liquid chromatography                          |
| 355 |         |                                                                  |

356 **References**

- 357 (1) Yeung, L. W. Y.; Mabury, S. A. Are Humans Exposed to Increasing Amounts of  
358 Unidentified Organofluorine. **2016**, *Environmental Chemistry*, 102–110.
- 359 (2) Miaz, L. T.; Plassmann, M. M.; Gyllenhammar, I.; Bignert, A.; Sandblom, O.;  
360 Lignell, S.; Glynn, A.; Benskin, J. P. Temporal Trends of Suspect- and Target-  
361 per/Polyfluoroalkyl Substances (PFAS), Extractable Organic Fluorine (EOF) and  
362 Total Fluorine (TF) in Pooled Serum from First-Time Mothers in Uppsala,  
363 Sweden, 1996–2017. **2020**, *Environmental Science Processes and Impacts* 22,  
364 1071–1083. <https://doi.org/10.1039/C9EM00502A>.
- 365 (3) Yeung, L. W. Y.; Miyake, Y.; Taniyasu, S.; Wang, Y.; Yu, H.; So, M. K.; Jiang,  
366 G.; Wu, Y.; Li, J.; Giesy, J. P.; Yamashita, N.; Lam, P. K. S. Perfluorinated  
367 Compounds and Total and Extractable Organic Fluorine in Human Blood  
368 Samples from China. **2008**, *Environmental Science and Technology* 42 (21),  
369 8140–8145. <https://doi.org/10.1021/es800631n>.
- 370 (4) Miyake, Y.; Yamashita, N.; Rostkowski, P.; Taniyasu, S.; Lam, P. K. S.; Kannan,  
371 K. Trace Analysis of Total Fluorine in Human Blood Using Combustion Ion  
372 Chromatography for Fluorine: A Mass Balance Approach for the Determination  
373 of Known and Unknown Organofluorine Compounds. **2007**, *Journal of*  
374 *Chromatography A* 1154, 214–221.  
375
